# Supplementary material for: IGFBP3-mediated M2 Macrophage Polarization Enhances Resistance to Rosiglitazone and Cisplatin in Breast Cancer
Source: Research Square preprint supplement (doi:10.21203/rs.3.rs-5174260/v1), 2024-11-01
Supplement: Supplementary file 1 [file fig1-BC-tumorvolume.xlsx]

## Sheet: fig1-bc
	d0					d5					d10					d15					d20
编号	W	a	b	S	V肿瘤体积	W	a	b	S	V肿瘤体积	W	a	b	S	V肿瘤体积	W	a	b	S	V肿瘤体积	W	a	b	S	V肿瘤体积		△	ave	△T/△C	TGI	TGI%
con1	18.3	5.57	5.23	A	76.1778	19.8	9.54	8.13	A	315.282	21.2	12.73	10.74	A	734.187	22.9	16.48	14.89	A	1826.91	24.4	20.96	17.18	B	3093.2		3017.02	2722.06	1.10836	-0.108359	-10.8359	0
con2	18.4	6.62	4.89	A	79.1491	19	7.59	7.37	A	206.133	21.3	11.99	8.93	A	478.071	22.2	16.35	11.84	A	1146.02	23.2	18.37	16.05	A	2366.08		2286.93		0.840147	0.159853	15.9853
con3	18.2	4.23	4.1	A	35.5532	19.6	7.64	6.04	A	139.36	21	8.8	7.93	A	276.694	20.6	12.14	11.65	A	823.836	24.5	17.15	16.18	A	2244.87		2209.32		0.811635	0.188365	18.8365
con4	17.5	7.95	3.62	A	52.09	19.5	9.35	9.03	A	381.204	22.1	12.59	9.19	A	531.651	23.3	16.52	13.32	A	1465.51	24.6	21.56	17.83	A	3427.06		3374.97		1.23986	-0.239859	-23.9859	0
RGZ1	18.4	5.75	4.11	A	48.5648	21.2	8.3	6.55	A	178.045	19.5	10.88	8.93	A	433.812	20.4	14.7	12.73	A	1191.09	21.1	19.32	16.96	A	2778.62		2730.05		1.00294	-0.00293697	-0.293697	0
RGZ2	18.6	5.24	4.46	A	52.116	19.7	9.25	8.18	A	309.47	20.2	14.57	9.54	A	663.02	23.1	19.49	15.5	A	2341.24	23.8	21.69	17.29	A	3242.05		3189.93		1.17188	-0.171883	-17.1883	0
RGZ3	19.1	7.19	4.38	A	68.9679	22	8.99	8.4	A	317.167	21.6	10.23	8.88	A	403.34	22.8	15.37	12.6	A	1220.07	22	17.21	13.4	A	1545.11		1476.15		0.54229	0.45771	45.771
RGZ4	18	7.02	5.51	A	106.564	19.3	9.91	8.7	A	375.044	19.2	13.52	10.04	A	681.419	21.7	15.09	13.95	A	1468.28	23	17.73	15.07	A	2013.28		1906.72		0.70047	0.29953	29.953
CIS1	16.9	6.98	5.83	A	118.621	19	8.59	8.1	A	281.795	21.3	12.42	8.15	A	412.484	22	14.96	12.61	A	1189.41	22	15.7	14.54	A	1659.58		1540.96		0.566101	0.433899	43.3899
CIS2	18.1	5.54	4.14	A	47.4767	20.1	10.19	7.91	A	318.784	22	12.6	9.86	A	612.483	23.2	14.22	13.86	A	1365.83	23.8	18.56	13.34	A	1651.43		1603.95		0.589242	0.410758	41.0758
CIS3	17.5	7.52	5.74	A	123.883	21.9	7.06	6.93	A	169.528	24.1	8.9	5.44	A	131.692	24.2	12.29	8.81	A	476.951	24.8	15.84	14.07	A	1567.88		1444		0.530481	0.469519	46.9519
CIS4	18.9	6.83	5.72	A	111.733	20.3	8.06	7.99	A	257.276	21.4	12.78	8.48	A	459.507	22.8	12.21	9	A	494.505	20.2	15.28	13.54	A	1400.65		1288.92		0.473509	0.526491	52.6491
COM1	19.3	6.45	5.67	A	103.68	22.6	8.44	6.72	A	190.568	22.9	10.89	6.53	A	232.18	21.7	13.41	8.81	A	520.416	22.8	14.94	9.45	A	667.09		563.409		0.206979	0.793021	79.3021
COM2	18.7	7.71	4.41	A	74.9724	21.5	6.22	5.25	A	85.7194	21.1	7.92	7.29	A	210.451	21.5	11.43	7.56	A	326.633	21.8	12.37	10.58	A	692.327		617.354		0.226797	0.773203	77.3203
COM3	17.4	6.82	6.14	A	128.556	18.9	9.32	7.97	A	296.007	22.2	8.81	7.24	A	230.9	23.4	9.92	8.42	A	351.646	23.6	10.05	9.98	A	500.492		371.936		0.136638	0.863362	86.3362
COM4	18.1	8.14	5.16	A	108.366	18.6	7.03	6.16	A	133.379	21.4	9.13	7.34	A	245.942	21.9	9.67	8.72	A	367.646	21.4	10.07	9.35	A	440.172		331.806		0.121895	0.878105	87.8105

## Sheet: fig1-d
	2 week					3 week				4 week
days	1	2	3	4	5	6	7	8	9	10	11	12	13	14
0	220.521	232.631	241.751	100.689	146.155	123.042	239.909	122.776	99.0252	86.1391	154.74	57.0006	79.7085	127.925
3	466.354	364.316	370.05	173.071	259.865	221.984	414.89	267.484	239.646	177.923	380.309	131.55	134.083	226.42
6	668.529	683.944	603.102	232.713	418.699	408.202	548.573	485.236	367.489	294.156	517.177	210.085	211.155	230.606
9	953.327	714.431	796.497	275.976	371.122	639.915	575.116	653.314	340.761	365.775	494.083	269.051	135.547	252.798
12						1084.75	925.237	1046.56	504.842	532.323	507.991	312.283	131.902	275.816
15						1681.88	982.991	1136.85	605.986	855.439	463.579	298.026	157.377	203.85
18						1799.47	1088.49	1173.57	885.64	1232.46	652.98	484.075	236.109	144.797
21										1448	969.009	543.92	433.232	395.529
24										2616.56	1644.38	694.84	610.072	699.756
27										2752.33	2075.52	918.706	1661.65	931.277
