# Supplementary material for: IGFBP3-mediated M2 Macrophage Polarization Enhances Resistance to Rosiglitazone and Cisplatin in Breast Cancer
Source: Research Square preprint supplement (doi:10.21203/rs.3.rs-5174260/v1), 2024-11-01
Supplement: Supplementary file 2 [file Book1.xlsx]

## Sheet: Sheet1
CONTROL
all	DEAD
28	3	25	0.892857	89.2857
157	10	147	0.936306	93.6306
100	11	89	0.89	89
37	5	32	0.864865	86.4865
PPAR
21	3	18	0.857143	85.7143
39	6	33	0.846154	84.6154			独立样本检验
27	5	22	0.814815	81.4815					方差方程的 Levene 检验		均值方程的 t 检验
22	7	15	0.681818	68.1818					F	Sig.	t	df	Sig.(双侧)	均值差值	标准误差值	差分的 95% 置信区间
																下限	上限
60		53	0.883333	88.3333			数据	假设方差相等	10.4293	0.00802319	4.60039	11	0.000764437	16.0308	3.48465	8.36111	23.7005
75		62	0.826667	82.6667				假设方差不相等			4.32062	6.26134	0.0045103	16.0308	3.7103	7.04309	25.0185
52		46	0.884615	88.4615
32		22	0.6875	68.75
26		17	0.653846	65.3846
20		13	0.65	65			组统计量
							组别		N	均值	标准差	均值的标准误
							数据	1.00	7	88.2663	3.28936	1.24326
								2.00	6	72.2355	8.56292	3.4958
