# Supplementary material for: IGFBP3-mediated M2 Macrophage Polarization Enhances Resistance to Rosiglitazone and Cisplatin in Breast Cancer
Source: Research Square preprint supplement (doi:10.21203/rs.3.rs-5174260/v1), 2024-11-01
Supplement: Supplementary file 3 [file fig2-H-LDH.xls]

## Sheet: Sheet1
	1	2	3	4	5	6	7	8	9	10	11	12
A													490
B													490
C													490
D		1.546	1.591	1.646	0.045	1.423	1.303	1.339	0.045	0.045	0.044		490
E		1.516	1.623	1.807	0.045	1.631	1.887	1.665	0.044	0.045	0.044		490
F		0.045	0.045	0.044	0.048	1.264	1.262	1.208	0.044	0.044	0.044		490
G		0.045	0.045	0.045	0.044	1.951	1.87	1.839	0.45	0.44	0.44		490
H													490

## Sheet: Sheet2
mo	m1	m2
1.546	1.591	1.646		1.423	1.303	1.339	468		1.423	1.631	1.264	1.951
1.516	1.623	1.807		1.631	1.887	1.665	468+doc		1.303	1.887	1.262	1.87
				1.264	1.262	1.208	468+rosi		1.339	1.665	1.208	1.839
				1.951	1.87	1.839	468+doc+rosi
									0.983	1.191	0.824	1.511
				0.45	0.44	0.44	0.443333		0.863	1.447	0.822	1.43
									0.899	1.225	0.768	1.399
									1.423
									1.303
									1.339
									1.631
									1.887
									1.665
									1.264
									1.262
									1.208
									1.951
									1.87
									1.839
描述
数值
	个案数	平均值	标准差	标准误差	平均值的 95% 置信区间	最小值	最大值
下限	上限
1	3	1.355	0.06158	0.03555	1.202	1.508	1.3	1.42
2	3	1.7277	0.13903	0.08027	1.3823	2.073	1.63	1.89
3	3	1.2447	0.03177	0.01834	1.1657	1.3236	1.21	1.26
4	3	1.8867	0.05783	0.03339	1.743	2.0303	1.84	1.95
总计	12	1.5535	0.28337	0.0818	1.3735	1.7335	1.21	1.95
多重比较
因变量: 数值
LSD
(I) 组别	(J) 组别	平均值差值 (I-J)	标准误差	显著性	95% 置信区间
下限	上限
1	2	-.37267*	0.06767	0.001	-0.5287	-0.2166
3	0.11033	0.06767	0.142	-0.0457	0.2664
4	-.53167*	0.06767	0	-0.6877	-0.3756
2	1	.37267*	0.06767	0.001	0.2166	0.5287
3	.48300*	0.06767	0	0.327	0.639
4	-.15900*	0.06767	0.047	-0.315	-0.003
3	1	-0.11033	0.06767	0.142	-0.2664	0.0457
2	-.48300*	0.06767	0	-0.639	-0.327
4	-.64200*	0.06767	0	-0.798	-0.486
4	1	.53167*	0.06767	0	0.3756	0.6877
2	.15900*	0.06767	0.047	0.003	0.315
3	.64200*	0.06767	0	0.486	0.798
*. 平均值差值的显著性水平为 0.05。
