# Supplementary material for: IGFBP3-mediated M2 Macrophage Polarization Enhances Resistance to Rosiglitazone and Cisplatin in Breast Cancer
Source: Research Square preprint supplement (doi:10.21203/rs.3.rs-5174260/v1), 2024-11-01
Supplement: Supplementary file 4 [file fig3-B-D-qPCR-GAIL1BTGFCD206_data.xls]

## Sheet: Results
Block Type	96well
Chemistry	SYBR_GREEN
Experiment File Name	D:\Gaochunyi\20180124GAIL1BTGFCD206.eds
Experiment Run End Time	2018-01-24 16:11:27 PM PST
Instrument Type	steponeplus
Passive Reference
Well	Sample Name	Target Name	Task	Reporter	Quencher	RQ	RQ Min	RQ Max	Cт	Cт Mean	Cт SD	ΔCт	ΔCт Mean	ΔCт SE	HK Control ΔCт Mean	HK Control ΔCт SE	ΔΔCт	Automatic Ct Threshold	Ct Threshold	Automatic Baseline	Baseline Start	Baseline End	Efficiency	Comments	HIGHSD	EXPFAIL
A1	2	GA	UNKNOWN	SYBR	None				15.7542	15.6942	0.303956							TRUE	22234.4	TRUE	1	2	1		N	N
A2	2	GA	UNKNOWN	SYBR	None				15.9637	15.6942	0.303956							TRUE	22234.4	TRUE	1	2	1		N	N
A3	2	GA	UNKNOWN	SYBR	None				15.3648	15.6942	0.303956							TRUE	22234.4	TRUE	1	2	1		N	N
A4	10	GA	UNKNOWN	SYBR	None				16.6101	16.5128	0.266306							TRUE	22234.4	TRUE	3	7	1		N	N
A5	10	GA	UNKNOWN	SYBR	None				16.2115	16.5128	0.266306							TRUE	22234.4	TRUE	3	5	1		N	N
A6	10	GA	UNKNOWN	SYBR	None				16.7168	16.5128	0.266306							TRUE	22234.4	TRUE	3	7	1		N	N
A7	12	GA	UNKNOWN	SYBR	None				27.6519	27.7781	0.132814							TRUE	22234.4	TRUE	3	16	1		N	N
A8	12	GA	UNKNOWN	SYBR	None				27.9167	27.7781	0.132814							TRUE	22234.4	TRUE	3	16	1		N	N
A9	12	GA	UNKNOWN	SYBR	None				27.7656	27.7781	0.132814							TRUE	22234.4	TRUE	3	18	1		N	N
A10	4	GA	UNKNOWN	SYBR	None				15.583	15.5668	0.1354							TRUE	22234.4	TRUE	1	2	1		N	N
A11	4	GA	UNKNOWN	SYBR	None				15.424	15.5668	0.1354							TRUE	22234.4	TRUE	1	2	1		N	N
A12	4	GA	UNKNOWN	SYBR	None				15.6933	15.5668	0.1354							TRUE	22234.4	TRUE	1	2	1		N	N
B1	2	IL1B	UNKNOWN	SYBR	None	1	0.362168	2.76115	28.0762	27.512	0.862074		11.8177	0.52775			0	TRUE	10346.2	TRUE	1	2	1		Y	N
B2	2	IL1B	UNKNOWN	SYBR	None	1	0.362168	2.76115	26.5196	27.512	0.862074		11.8177	0.52775			0	TRUE	10346.2	TRUE	1	2	1		Y	N
B3	2	IL1B	UNKNOWN	SYBR	None	1	0.362168	2.76115	27.94	27.512	0.862074		11.8177	0.52775			0	TRUE	10346.2	TRUE	1	2	1		Y	N
B4	10	IL1B	UNKNOWN	SYBR	None	1.41833	1.02254	1.96733	27.6855	27.8263	0.12569		11.3135	0.170017			-0.504196	TRUE	10346.2	TRUE	3	16	1		N	N
B5	10	IL1B	UNKNOWN	SYBR	None	1.41833	1.02254	1.96733	27.9272	27.8263	0.12569		11.3135	0.170017			-0.504196	TRUE	10346.2	TRUE	3	17	1		N	N
B6	10	IL1B	UNKNOWN	SYBR	None	1.41833	1.02254	1.96733	27.8664	27.8263	0.12569		11.3135	0.170017			-0.504196	TRUE	10346.2	TRUE	3	20	1		N	N
B7	12	IL1B	UNKNOWN	SYBR	None	11.6184			36.0575	36.0575			8.27939				-3.53834	TRUE	10346.2	TRUE	3	25	1		N	N
B8	12	IL1B	UNKNOWN	SYBR	None				Undetermined	36.0575								TRUE	10346.2	TRUE	3	16	1		N	N
B9	12	IL1B	UNKNOWN	SYBR	None				Undetermined	36.0575								TRUE	10346.2	TRUE	3	39	1		N	N
B10	4	IL1B	UNKNOWN	SYBR	None	0.73523	0.0813395	6.64576	25.8424	27.8282	1.97678		12.2615	1.14397			0.443733	TRUE	10346.2	TRUE	1	2	1		Y	N
B11	4	IL1B	UNKNOWN	SYBR	None	0.73523	0.0813395	6.64576	29.7959	27.8282	1.97678		12.2615	1.14397			0.443733	TRUE	10346.2	TRUE	3	18	1		Y	N
B12	4	IL1B	UNKNOWN	SYBR	None	0.73523	0.0813395	6.64576	27.8464	27.8282	1.97678		12.2615	1.14397			0.443733	TRUE	10346.2	TRUE	1	2	1		Y	N
C1	2	TGF	UNKNOWN	SYBR	None	1	0.654028	1.52899	25.2122	24.9692	0.231621		9.27492	0.220633			0	TRUE	19009.9	TRUE	3	5	1		N	N
C2	2	TGF	UNKNOWN	SYBR	None	1	0.654028	1.52899	24.9444	24.9692	0.231621		9.27492	0.220633			0	TRUE	19009.9	TRUE	1	2	1		N	N
C3	2	TGF	UNKNOWN	SYBR	None	1	0.654028	1.52899	24.7509	24.9692	0.231621		9.27492	0.220633			0	TRUE	19009.9	TRUE	1	2	1		N	N
C4	10	TGF	UNKNOWN	SYBR	None	0.311527	0.230679	0.420713	27.4509	27.4703	0.0469788		10.9575	0.156126			1.68257	TRUE	19009.9	TRUE	3	20	1		N	N
C5	10	TGF	UNKNOWN	SYBR	None	0.311527	0.230679	0.420713	27.4361	27.4703	0.0469788		10.9575	0.156126			1.68257	TRUE	19009.9	TRUE	3	17	1		N	N
C6	10	TGF	UNKNOWN	SYBR	None	0.311527	0.230679	0.420713	27.5239	27.4703	0.0469788		10.9575	0.156126			1.68257	TRUE	19009.9	TRUE	3	19	1		N	N
C7	12	TGF	UNKNOWN	SYBR	None				Undetermined									TRUE	19009.9	TRUE	3	38	1		N	N
C8	12	TGF	UNKNOWN	SYBR	None				Undetermined									TRUE	19009.9	TRUE	3	44	1		N	Y
C9	12	TGF	UNKNOWN	SYBR	None				Undetermined									TRUE	19009.9	TRUE	3	32	1		N	N
C10	4	TGF	UNKNOWN	SYBR	None	2.01837	1.64439	2.47739	23.9697	23.8285	0.125221		8.26174	0.106479			-1.01319	TRUE	19009.9	TRUE	1	2	1		N	N
C11	4	TGF	UNKNOWN	SYBR	None	2.01837	1.64439	2.47739	23.7309	23.8285	0.125221		8.26174	0.106479			-1.01319	TRUE	19009.9	TRUE	1	2	1		N	N
C12	4	TGF	UNKNOWN	SYBR	None	2.01837	1.64439	2.47739	23.7849	23.8285	0.125221		8.26174	0.106479			-1.01319	TRUE	19009.9	TRUE	1	2	1		N	N
D1	2	CD206	UNKNOWN	SYBR	None	1	0.241755	4.13642	28.7828	27.369	1.24118		11.6748	0.737772			0	TRUE	10986.6	TRUE	3	5	1		Y	N
D2	2	CD206	UNKNOWN	SYBR	None	1	0.241755	4.13642	26.8656	27.369	1.24118		11.6748	0.737772			0	TRUE	10986.6	TRUE	3	5	1		Y	N
D3	2	CD206	UNKNOWN	SYBR	None	1	0.241755	4.13642	26.4586	27.369	1.24118		11.6748	0.737772			0	TRUE	10986.6	TRUE	1	2	1		Y	N
D4	10	CD206	UNKNOWN	SYBR	None	0.0668151	0.0494333	0.0903086	32.1227	32.0913	0.0511616		15.5785	0.156564			3.90368	TRUE	10986.6	TRUE	3	22	1		N	N
D5	10	CD206	UNKNOWN	SYBR	None	0.0668151	0.0494333	0.0903086	32.0322	32.0913	0.0511616		15.5785	0.156564			3.90368	TRUE	10986.6	TRUE	3	25	1		N	N
D6	10	CD206	UNKNOWN	SYBR	None	0.0668151	0.0494333	0.0903086	32.1188	32.0913	0.0511616		15.5785	0.156564			3.90368	TRUE	10986.6	TRUE	3	23	1		N	N
D7	12	CD206	UNKNOWN	SYBR	None				Undetermined									TRUE	10986.6	TRUE	3	39	1		N	N
D8	12	CD206	UNKNOWN	SYBR	None				Undetermined									TRUE	10986.6	TRUE	1	2	1		N	N
D9	12	CD206	UNKNOWN	SYBR	None				Undetermined									TRUE	10986.6	TRUE	3	15	1		N	N
D10	4	CD206	UNKNOWN	SYBR	None	0.942676	0.0130494	68.0982	24.6834	27.3267	3.84964		11.7599	2.22396			0.0851657	TRUE	10986.6	TRUE	1	2	1		Y	N
D11	4	CD206	UNKNOWN	SYBR	None	0.942676	0.0130494	68.0982	31.7434	27.3267	3.84964		11.7599	2.22396			0.0851657	TRUE	10986.6	TRUE	3	23	1		Y	N
D12	4	CD206	UNKNOWN	SYBR	None	0.942676	0.0130494	68.0982	25.5534	27.3267	3.84964		11.7599	2.22396			0.0851657	TRUE	10986.6	TRUE	1	2	1		Y	N
E1	11	GA	UNKNOWN	SYBR	None				15.6398	15.6497	0.281699							TRUE	22234.4	TRUE	1	2	1		N	N
E2	11	GA	UNKNOWN	SYBR	None				15.9362	15.6497	0.281699							TRUE	22234.4	TRUE	3	5	1		N	N
E3	11	GA	UNKNOWN	SYBR	None				15.373	15.6497	0.281699							TRUE	22234.4	TRUE	1	2	1		N	N
F1	11	IL1B	UNKNOWN	SYBR	None	0.0835038	0.0583235	0.119555	31.2292	31.0494	0.158038		15.3997	0.186485			3.58201	TRUE	10346.2	TRUE	3	23	1		N	N
F2	11	IL1B	UNKNOWN	SYBR	None	0.0835038	0.0583235	0.119555	30.9868	31.0494	0.158038		15.3997	0.186485			3.58201	TRUE	10346.2	TRUE	3	23	1		N	N
F3	11	IL1B	UNKNOWN	SYBR	None	0.0835038	0.0583235	0.119555	30.9323	31.0494	0.158038		15.3997	0.186485			3.58201	TRUE	10346.2	TRUE	3	16	1		N	N
G1	11	TGF	UNKNOWN	SYBR	None	0.401408	0.134283	1.19991	26.9811	26.2415	0.944414		10.5918	0.568997			1.31686	TRUE	19009.9	TRUE	3	16	1		Y	N
G2	11	TGF	UNKNOWN	SYBR	None	0.401408	0.134283	1.19991	25.1776	26.2415	0.944414		10.5918	0.568997			1.31686	TRUE	19009.9	TRUE	1	2	1		Y	N
G3	11	TGF	UNKNOWN	SYBR	None	0.401408	0.134283	1.19991	26.5657	26.2415	0.944414		10.5918	0.568997			1.31686	TRUE	19009.9	TRUE	3	16	1		Y	N
H1	11	CD206	UNKNOWN	SYBR	None	0.0374792	0.0252445	0.0556435	32.3112	32.0622	0.217124		16.4125	0.205343			4.73777	TRUE	10986.6	TRUE	3	23	1		N	N
H2	11	CD206	UNKNOWN	SYBR	None	0.0374792	0.0252445	0.0556435	31.9629	32.0622	0.217124		16.4125	0.205343			4.73777	TRUE	10986.6	TRUE	3	23	1		N	N
H3	11	CD206	UNKNOWN	SYBR	None	0.0374792	0.0252445	0.0556435	31.9126	32.0622	0.217124		16.4125	0.205343			4.73777	TRUE	10986.6	TRUE	3	16	1		N	N
Analysis Type	Singleplex
Endogenous Control	GA
RQ Min/Max Confidence Level	95.0
Reference Sample	2

## Sheet: Sheet1
Sample Name	Target Name	Cт						△CT
										△△ct		F
2	GA	15.2888	15.1578	IL1B	31.9179	32.4046		17.2468	18.0043	-0.757535		1.6906		1.84087	1.6906
2	GA	15.0857		IL1B										2.61097	0.279033		描述
2	GA	15.099		IL1B	32.8913									1.35346	1.38833		数值
10	GA	14.9323	14.9135	IL1B	34.3191	34.7593		19.8458		1.84149		0.279033		0.15372	1.5269			N	均值	标准差	标准误	均值的 95% 置信区间		极小值	极大值
10	GA	14.9067		IL1B	34.9824									0.0416585	1.64824							下限	上限
10	GA	14.9015		IL1B	34.9764									0.0754165	2.9839		1.00	4	1.22121	0.640158	0.320079	0.202581	2.23985	0.27903	1.6906
4	GA	15.2514	15.3469	IL1B	33.6639	32.8778		17.5309		-0.473355		1.38833		0.0491173	1.94336		2.00	4	3.79332	3.2538	1.6269	-1.3842	8.97084	1.64824	8.59777
4	GA	15.4494		IL1B	31.3388									0.217304	8.59777		3.00	4	29.0654	36.5219	18.2609	-29.049	87.1799	0.63276	78.4095
4	GA	15.3398		IL1B	33.6308									1.98176	78.4095		4.00	3	11.4163	9.26763	5.35067	-11.6057	34.4384	4.57331	21.963
11	GA	15.5095	15.2657	IL1B	31.569	32.6593		17.3937		-0.610601		1.5269		0.885518	35.036		总数	15	11.3713	20.8745	5.38978	-0.188675	22.9312	0.27903	78.4095
11	GA	15.1701		IL1B	33.3485									0.0159928	0.632763
11	GA	15.1174		IL1B	33.0606									0.0551859	2.18347		多重比较
2	GA	14.8978	14.7285	IL-1B	32.309	32.0119		17.2834	16.4141	-0.72093		1.64824		3.19589	126.447		因变量: 数值 LSD
2	GA	14.3141		IL-1B	31.6196									0.555105	21.9631		(I) 组别		均值差 (I-J)	标准误	显著性	95% 置信区间
2	GA	14.9737		IL-1B	32.1072									0.194932	7.71261							下限	上限
3	GA	14.963	13.743	IL-1B	30.134	30.1701		16.4271		-1.5772		2.9839		0.115588	4.57331		1.00	2.00	-2.5721	13.8274	0.855819	-33.0059	27.8617
3	GA	13.2543		IL-1B	30.4151													3.00	-27.8442	13.8274	0.0691595	-58.278	2.58959
3	GA	13.0116		IL-1B	29.9611													4.00	-10.1951	14.9353	0.508967	-43.0674	22.6772
4	GA	13.7331	13.6864	IL-1B	30.7118	30.7322		17.0457		-0.958551		1.94336					2.00	1.00	2.5721	13.8274	0.855819	-27.8617	33.0059
4	GA	13.6194		IL-1B	30.516													3.00	-25.2721	13.8274	0.0948224	-55.7059	5.16169
4	GA	13.7068		IL-1B	30.9687													4.00	-7.62301	14.9353	0.619855	-40.4953	25.2493
5	GA	17.0799	17.0799	IL1-B	31.9802	31.9802		14.9003		-3.10396		8.59777					3.00	1.00	27.8442	13.8274	0.0691595	-2.58959	58.278
5	GA	17.0799		IL1-B	31.9802													2.00	25.2721	13.8274	0.0948224	-5.16169	55.7059
5	GA	17.0799		IL1-B	31.9802													4.00	17.6491	14.9353	0.262238	-15.2232	50.5214
6	GA	16.0846	16.0774	IL-1B	27.9723	27.7888		11.7113		-6.29296		78.4095					4.00	1.00	10.1951	14.9353	0.508967	-22.6772	43.0674
6	GA	16.2365		IL-1B	27.7743													2.00	7.62301	14.9353	0.619855	-25.2493	40.4953
6	GA	15.9112		IL-1B	27.6197													3.00	-17.6491	14.9353	0.262238	-50.5214	15.2232
10	GA	14.8108	14.9371	IL-1B	27.8052	27.8106		12.8735		-5.13077		35.036
10	GA	15.0824		IL-1B	27.8684												1.22121	0.320079
10	GA	14.918		IL-1B	27.7582												3.79332	1.6269
20	GA	14.9636	14.89	IL-1B	33.4155	33.5546		18.6646		0.660262		0.632763					29.0654	18.2609
20	GA	14.7727		IL-1B	33.5091												11.4163	5.35067
20	GA	14.9338		IL-1B	33.7392
13	GA	13.7648	13.8908	IL-1B	30.9343	30.7685		16.8777		-1.12662		2.18347
13	GA	14.1284		IL-1B	30.7375
13	GA	13.7792		IL-1B	30.6337
7	GA	17.3856	17.4229	IL1-B	28.7173	28.4448		11.0219		-6.98239		126.447
7	GA	17.4962		IL1-B	28.4797
7	GA	17.3869		IL1-B	28.1374
14	GA	15.3519	15.4382	IL1-B	28.8961	28.9855		13.5473		-4.45701		21.9631
14	GA	15.2752		IL1-B	28.8436
14	GA	15.6875		IL1-B	29.2169
1	GA	16.795	16.6474	IL1-B	31.5302	31.7044		15.0571		-2.94722		7.71261
1	GA	16.8274		IL1-B	31.9084
1	GA	16.3197		IL1-B	31.6747
15	GA	16.9845	16.9616	IL1-B	32.9728	32.7726		15.8111		-2.19324		4.57331
15	GA	16.8313		IL1-B	32.6415
15	GA	17.0689		IL1-B	32.7036
																描述
																数值
2	GA	15.2888	15.1578	TGF	34.6726	33.8494		18.6916	16.4468	2.2448		0.210983		0.210983			N	均值	标准差	标准误	均值的 95% 置信区间		极小值	极大值
2	GA	15.0857		TGF	33.9827									0.293465							下限	上限
2	GA	15.099		TGF	32.893									4.15343		1.00	4	2.13661	2.17885	1.08942	-1.33042	5.60364	0.21098	4.15343
10	GA	14.9323	14.9135	TGF	32.9836	33.129		18.2155		1.76874		0.293465		3.88856		2.00	4	12.8995	12.8711	6.43553	-7.58124	33.3802	2.41204	31.4881
10	GA	14.9067		TGF	33.4932									6.76842		3.00	4	12.109	14.2647	7.13234	-10.5893	34.8073	1.35821	32.9253
10	GA	14.9015		TGF	32.9103									2.41204		4.00	4	72.3829	15.6308	7.81541	47.5108	97.255	51.5918	89.4532
4	GA	15.2514	15.3469	TGF	29.1908	29.7394		14.3925		-2.0543		4.15343		10.9294		总数	16	24.882	30.7423	7.68557	8.50059	41.2634	0.21098	89.4532
4	GA	15.4494		TGF	29.2928									31.488
4	GA	15.3398		TGF	30.7346									4.74304
11	GA	15.5095	15.2657	TGF	30.0122	29.7532		14.4876		-1.95923		3.88856		32.9253		多重比较
11	GA	15.1701		TGF	30.0073									1.35821		因变量: 数值 LSD
11	GA	15.1174		TGF	29.2401									9.4094		(I) 组别		均值差 (I-J)	标准误	显著性	95% 置信区间
2	GA	14.8978	14.7285	TGF-B	28.272	28.4165		13.688	13.3328	-2.75882		6.76842		75.3342							下限	上限
2	GA	14.3141		TGF-B	28.6596									73.1526		1.00	2.00	-10.7629	8.79072	0.244316	-29.9162	8.39047
2	GA	14.9737		TGF-B	28.3179									89.4532			3.00	-9.97237	8.79072	0.278772	-29.1257	9.18097
3	GA	14.963	13.743	TGF-B	28.9454	28.9195		15.1765		-1.27025		2.41204		51.5918			4.00	-70.24632*	8.79072	3.80367e-06	-89.3997	-51.093
3	GA	13.2543		TGF-B	28.8605											2.00	1.00	10.7629	8.79072	0.244316	-8.39047	29.9162
3	GA	13.0116		TGF-B	28.9527												3.00	0.790498	8.79072	0.929831	-18.3628	19.9438
4	GA	13.7331	13.6864	TGF-B	26.5918	26.6831		12.9967		-3.45014		10.9294					4.00	-59.48345*	8.79072	1.99587e-05	-78.6368	-40.3301
4	GA	13.6194		TGF-B	26.5448											3.00	1.00	9.97237	8.79072	0.278772	-9.18097	29.1257
4	GA	13.7068		TGF-B	26.9127												2.00	-0.790498	8.79072	0.929831	-19.9438	18.3628
5	GA	17.0799	17.0799	TGF-B	28.5499	28.5499		11.4701		-4.97673		31.488					4.00	-60.27395*	8.79072	1.75585e-05	-79.4273	-41.1206
5	GA	17.0799		TGF-B	28.5499											4.00	1.00	70.24632*	8.79072	3.80367e-06	51.093	89.3997
5	GA	17.0799		TGF-B	28.5499												2.00	59.48345*	8.79072	1.99587e-05	40.3301	78.6368
6	GA	16.0846	16.0774	TGF-B	30.6604	30.2784		14.201		-2.24581		4.74304					3.00	60.27395*	8.79072	1.75585e-05	41.1206	79.4273
6	GA	16.2365		TGF-B	30.2096											*. 均值差的显著性水平为 0.05。
6	GA	15.9112		TGF-B	29.9652
10	GA	14.8108	14.9371	TGF-B	26.3663	26.3428		11.4057		-5.04112		32.9253				2.13661	1.08942
10	GA	15.0824		TGF-B	26.2428											12.8995	6.43553
10	GA	14.918		TGF-B	26.4192											12.109	7.13234
20	GA	14.9636	14.89	TGF-B	30.7591	30.8951		16.0051		-0.441711		1.35821				72.3829	7.81541
20	GA	14.7727		TGF-B	30.9325
20	GA	14.9338		TGF-B	30.9938
13	GA	13.7648	13.8908	TGF-B	27.3901	27.1035		13.2127		-3.2341		9.4094
13	GA	14.1284		TGF-B	26.9937
13	GA	13.7792		TGF-B	26.9267
7	GA	17.3856	17.4229	TGF-B	27.9741	27.6345		10.2116		-6.23523		75.3342
7	GA	17.4962		TGF-B	27.6328
7	GA	17.3869		TGF-B	27.2965
14	GA	15.3519	15.4382	TGF-B	25.5601	25.6922		10.254		-6.19284		73.1526
14	GA	15.2752		TGF-B	26.0331
14	GA	15.6875		TGF-B	25.4834
1	GA	16.795	16.6474	TGF-B	26.4833	26.6111		9.96374		-6.48306		89.4532
1	GA	16.8274		TGF-B	26.4052
1	GA	16.3197		TGF-B	26.9448
15	GA	16.9845	16.9616	TGF-B	27.6556	27.7193		10.7577		-5.68907		51.5918
15	GA	16.8313		TGF-B	27.7144
15	GA	17.0689		TGF-B	27.7879
2	GA	15.2888	15.1578	CD206	32.5905	32.0605		16.9027	16.5455	0.357192		0.780682		4.53673	0.780682		描述
2	GA	15.0857		CD206	31.9328									0.303122	1.03354		数值
2	GA	15.099		CD206	31.6582									4.27667	0.940914			N	均值	标准差	标准误	均值的 95% 置信区间		极小值	极大值
10	GA	14.9323	14.9135	CD206	31.3479	31.4114		16.4979		-0.0475889		1.03354		0.170033	1.3172							下限	上限
10	GA	14.9067		CD206	31.3936									0.0149602	0.0964762		1.00	4	1.01808	0.225112	0.112556	0.65988	1.37629	0.78068	1.3172
10	GA	14.9015		CD206	31.4927									0.0447698	0.288715		2.00	4	1.20543	2.12257	1.06129	-2.17206	4.58292	0.051	4.38554
4	GA	15.2514	15.3469	CD206	31.8458	31.9802		16.6333		0.0878659		0.940914		0.00790804	0.0509979		3.00	4	0.702718	0.521924	0.260962	-0.12778	1.53322	0.27621	1.41646
4	GA	15.4494		CD206	32.058									0.680049	4.38554		4.00	4	4.75895	3.28266	1.64133	-0.464499	9.9824	0.39009	8.06182
4	GA	15.3398		CD206	32.0369									0.0548003	0.3534		总数	16	1.9213	2.45323	0.613307	0.614064	3.22853	0.051	8.06182
11	GA	15.5095	15.2657	CD206	31.3492	31.4137		16.148		-0.397469		1.3172		0.0428302	0.276206
11	GA	15.1701		CD206	31.2038									0.118595	0.764802
11	GA	15.1174		CD206	31.688									0.219644	1.41646
2	GA	14.8978	14.7285	CD206	34.8486	34.6477		19.9192	18.3771	3.37368		0.0964762		0.966215	6.23099		多重比较
2	GA	14.3141		CD206	34.319									0.06049	0.390092		因变量: 数值 LSD
2	GA	14.9737		CD206	34.7755									1.25011	8.06182		(I) 组别		均值差 (I-J)	标准误	显著性	95% 置信区间
3	GA	14.963	13.743	CD206	31.9189	32.0807		18.3378		1.79228		0.288715		0.674989	4.35291							下限	上限
3	GA	13.2543		CD206	32.3078												1.00	2.00	-0.18735	1.39662	0.895511	-3.23031	2.85561
3	GA	13.0116		CD206	32.0156													3.00	0.315365	1.39662	0.825152	-2.7276	3.35833
4	GA	13.7331	13.6864	CD206	33.946	34.5253		20.8389		4.29342		0.0509979						4.00	-3.74087*	1.39662	0.0200917	-6.78383	-0.697906
4	GA	13.6194		CD206	34.4474												2.00	1.00	0.18735	1.39662	0.895511	-2.85561	3.23031
4	GA	13.7068		CD206	35.1826													3.00	0.502715	1.39662	0.725138	-2.54025	3.54568
5	GA	17.0799	17.0799	CD206	31.4926	31.4926		14.4127		-2.13276		4.38554						4.00	-3.55352*	1.39662	0.0257303	-6.59648	-0.510556
5	GA	17.0799		CD206	31.4926												3.00	1.00	-0.315365	1.39662	0.825152	-3.35833	2.7276
5	GA	17.0799		CD206	31.4926													2.00	-0.502715	1.39662	0.725138	-3.54568	2.54025
6	GA	16.0846	16.0774	CD206	34.6652	34.1235		18.0461		1.50063		0.3534						4.00	-4.05623*	1.39662	0.0132195	-7.0992	-1.01327
6	GA	16.2365		CD206	34.2546												4.00	1.00	3.74087*	1.39662	0.0200917	0.697906	6.78383
6	GA	15.9112		CD206	33.4508													2.00	3.55352*	1.39662	0.0257303	0.510556	6.59648
10	GA	14.8108	14.9371	CD206	33.0463	33.3387		18.4017		1.85618		0.276206						3.00	4.05623*	1.39662	0.0132195	1.01327	7.0992
10	GA	15.0824		CD206	33.696												*. 均值差的显著性水平为 0.05。
10	GA	14.918		CD206	33.2739
20	GA	14.9636	14.89	CD206	31.8839	31.8224		16.9323		0.386842		0.764802					1.01808	0.112556
20	GA	14.7727		CD206	31.6765												1.20543	1.06129
20	GA	14.9338		CD206	31.9067												0.702718	0.260962
13	GA	13.7648	13.8908	CD206	30.247	29.934		16.0432		-0.502287		1.41646					4.75895	1.64133
13	GA	14.1284		CD206	29.9184
13	GA	13.7792		CD206	29.6365
7	GA	17.3856	17.4229	CD206	31.8976	31.3289		13.906		-2.63946		6.23099
7	GA	17.4962		CD206	31.18
7	GA	17.3869		CD206	30.9092
14	GA	15.3519	15.4382	CD206	33.1874	33.3418		17.9036		1.35811		0.390092
14	GA	15.2752		CD206	33.3023
14	GA	15.6875		CD206	33.5357
1	GA	16.795	16.6474	CD206	29.935	30.1817		13.5344		-3.01111		8.06182
1	GA	16.8274		CD206	30.1432
1	GA	16.3197		CD206	30.467
15	GA	16.9845	16.9616	CD206	31.2996	31.3851		14.4235		-2.12198		4.35291
15	GA	16.8313		CD206	31.2642
15	GA	17.0689		CD206	31.5913
