# Supplementary material for: IGFBP3-mediated M2 Macrophage Polarization Enhances Resistance to Rosiglitazone and Cisplatin in Breast Cancer
Source: Research Square preprint supplement (doi:10.21203/rs.3.rs-5174260/v1), 2024-11-01
Supplement: Supplementary file 5 [file fig3-E-DAB-CD206CD11BCD86-DOI.xlsx]

## Sheet: Sheet1
	NO	CD11B	CD206	CD86	NO	CD11B	CD206	CD86	NO	CD11B	CD206	CD86
	1	63	13	41	6	81	24	57	7	217	65	31
	2	142	7	20	9	548	61	216	10	193	46	52
	3	38	2	4	14	64	22	36.5	13	355	44	65
	4	35	1	3	20	37	5	32	15	350	160	26
	5	23	6	21
		60.2	5.8	17.8		182.5	28	85.375		278.75	78.75	43.5
			0.0963455	0.295681			0.153425	0.467808			0.282511	0.156054
2 weeks	NO	CD11B	CD206		1	NO	CD11B	CD86		1
	1	63	13	0.206349	20.6349	1	63	41	0.650794	65.0794
	2	142	7	0.0492958	4.92958	2	142	20	0.140845	14.0845
	3	38	2	0.0526316	5.26316	3	38	4	0.105263	10.5263
	4	35	1	0.0285714	2.85714	4	35	3	0.0857143	8.57143
	5	23	6	0.26087	26.087
3 weeks	NO	CD11B	CD206			NO	CD11B	CD86
	6	81	24	0.296296	29.6296	6	81	57	0.703704	70.3704
	9	548	61	0.111314	11.1314	9	548	216	0.394161	39.4161
	14	64	22	0.34375	34.375	14	64	36.5	0.570312	57.0312
	20	37	5	0.135135	13.5135	20	37	32	0.864865	86.4865
4 weeks	NO	CD11B	CD206			NO	CD11B	CD86
	7	217	65	0.299539	29.9539	7	217	31	0.142857	14.2857
	10	193	46	0.238342	23.8342	10	193	52	0.26943	26.943
	13	355	44	0.123944	12.3944	13	355	65	0.183099	18.3099
	15	350	160	0.457143	45.7143	15	350	26	0.0742857	7.42857
