# Supplementary material for: IGFBP3-mediated M2 Macrophage Polarization Enhances Resistance to Rosiglitazone and Cisplatin in Breast Cancer
Source: Research Square preprint supplement (doi:10.21203/rs.3.rs-5174260/v1), 2024-11-01
Supplement: Supplementary file 6 [file fig3-C-qPCR.xlsx]

## Sheet: Sheet1
Sample Name	Target Name	Cт						△CT		△△ct		F
PMA1	GA	14.8978	14.7285	INOS	33.604	33.3364		18.6079	19.6787	-1.07081		2.10062
PMA1	GA	14.3141		INOS	33.0797
PMA1	GA	14.9737		INOS	33.3256
PMA2	GA	14.963	13.743	INOS	33.5898	33.8998		20.1568		0.478072		0.717936
PMA2	GA	13.2543		INOS	34.0672
PMA2	GA	13.0116		INOS	34.0423
PMA3	GA	13.7331	13.6864	INOS	34.0198	33.9579		20.2714		0.59274		0.663082
PMA3	GA	13.6194		INOS	33.416
PMA3	GA	13.7068		INOS	34.4379
LPS	GA	17.0799	17.0799	INOS	32.1832	32.1832		15.1033		-4.5754		23.8415
LPS	GA	17.0799		INOS	32.1832
LPS	GA	17.0799		INOS	32.1832
LPS	GA	16.0846	16.0774	INOS	31.9136	31.6118		15.5343		-4.14435		17.6838
LPS	GA	16.2365		INOS	31.8912
LPS	GA	15.9112		INOS	31.0305
LPS	GA	14.8108	14.9371	INOS	30.6216	30.7603		15.8232		-3.8555		14.4751
LPS	GA	15.0824		INOS	30.8114
LPS	GA	14.918		INOS	30.8478
IL4	GA	14.9636	14.89	INOS	32.3017	33.0004		18.1104		-1.56829		2.96553
IL4	GA	14.7727		INOS	32.8672
IL4	GA	14.9338		INOS	33.8324
IL4	GA	13.7648	13.8908	INOS	32.9164	32.8772		18.9864		-0.692287		1.61584
IL4	GA	14.1284		INOS	32.9268
IL4	GA	13.7792		INOS	32.7885
IL4	GA	16.6884	16.5049	INOS	34.9327	34.5388		18.034		-1.64473		3.12689
IL4	GA	16.221		INOS	33.7942
IL4	GA	16.6053		INOS	34.8896
RGZ+PMA	GA	15.3519	15.4382	INOS	32.6391	32.7825		17.3443		-2.33438		5.04333		2.10062
RGZ+PMA	GA	15.2752		INOS	32.9177									0.717936
RGZ+PMA	GA	15.6875		INOS	32.7909									0.663082
RGZ+PMA	GA	16.795	16.6474	INOS	33.153	33.6145		16.9672		-2.71153		6.55016		23.8415
RGZ+PMA	GA	16.8274		INOS	33.9757									17.6838
RGZ+PMA	GA	16.3197		INOS	33.7149									14.4751
RGZ+PMA	GA	16.9845	16.9616	INOS	33.2284	33.3938		16.4323		-3.24642		9.49008		2.96553
RGZ+PMA	GA	16.8313		INOS	33.5592									1.61584
RGZ+PMA	GA	17.0689		INOS										3.12689
														5.04333
RGZ+LPS	GA	16.5249	16.7641	INOS	34.0424	33.9905		17.2264		-2.45229		5.47284		6.55016
RGZ+LPS	GA	16.9504		INOS	33.9122									9.49008
RGZ+LPS	GA	16.8169		INOS	34.0168									5.47284
RGZ+LPS	GA	16.9821	16.9056	INOS	32.9497	32.9896		16.084		-3.59474		12.0816		12.0816
RGZ+LPS	GA	17.0072		INOS	32.9234									7.98837
RGZ+LPS	GA	16.7275		INOS	33.0956
RGZ+LPS	GA	16.1887	16.1523	INOS	32.985	32.8331		16.6808		-2.9979		7.98837
RGZ+LPS	GA	16.0757		INOS	32.7479
RGZ+LPS	GA	16.1926		INOS	32.7665
										△△ct		F
PMA1	GA	14.8978	14.7285	IL-1B	32.309	32.0119		17.2834	16.9187	0.36463		0.776668
PMA1	GA	14.3141		IL-1B	31.6196
PMA1	GA	14.9737		IL-1B	32.1072
PMA2	GA	14.963	13.743	IL-1B	30.134	30.1701		16.4271		-0.491638		1.40604
PMA2	GA	13.2543		IL-1B	30.4151
PMA2	GA	13.0116		IL-1B	29.9611
PMA3	GA	13.7331	13.6864	IL-1B	30.7118	30.7322		17.0457		0.127009		0.915728
PMA3	GA	13.6194		IL-1B	30.516
PMA3	GA	13.7068		IL-1B	30.9687
LPS	GA	17.0799	17.0799	IL1-B	29.9802	29.9802		12.9003		-4.0184		16.2054
LPS	GA	17.0799		IL1-B	29.9802
LPS	GA	17.0799		IL1-B	29.9802
LPS	GA	16.0846	16.0774	IL-1B	27.9723	27.7888		11.7113		-5.2074		36.9473
LPS	GA	16.2365		IL-1B	27.7743
LPS	GA	15.9112		IL-1B	27.6197
LPS	GA	14.8108	14.9371	IL-1B	27.8052	27.8106		12.8735		-4.04521		16.5093
LPS	GA	15.0824		IL-1B	27.8684
LPS	GA	14.918		IL-1B	27.7582
IL4	GA	14.9636	14.89	IL-1B	33.4155	33.5546		18.6646		1.74582		0.298164
IL4	GA	14.7727		IL-1B	33.5091
IL4	GA	14.9338		IL-1B	33.7392
IL4	GA	13.7648	13.8908	IL-1B	30.9343	30.7685		16.8777		-0.0410597		1.02887
IL4	GA	14.1284		IL-1B	30.7375
IL4	GA	13.7792		IL-1B	30.6337
IL4	GA	16.6884	16.5049	IL1-B	30.7173	31.1115		14.6066		-2.31213		4.96617
IL4	GA	16.221		IL1-B	31.4797
IL4	GA	16.6053		IL1-B	31.1374
RGZ+PMA	GA	15.3519	15.4382	IL1-B	30.8961	30.9855		15.5473		-1.37145		2.5873
RGZ+PMA	GA	15.2752		IL1-B	30.8436
RGZ+PMA	GA	15.6875		IL1-B	31.2169
RGZ+PMA	GA	16.795	16.6474	IL1-B	31.5302	31.7044		15.0571		-1.86166		3.63425
RGZ+PMA	GA	16.8274		IL1-B	31.9084
RGZ+PMA	GA	16.3197		IL1-B	31.6747
RGZ+PMA	GA	16.9845	16.9616	IL1-B	32.9728	32.7726		15.8111		-1.10768		2.15498
RGZ+PMA	GA	16.8313		IL1-B	32.6415
RGZ+PMA	GA	17.0689		IL1-B	32.7036
RGZ+LPS	GA	16.5249	16.7641	IL-1B	29.826	29.9298		13.1657		-3.75301		13.4825
RGZ+LPS	GA	16.9504		IL-1B	29.9177
RGZ+LPS	GA	16.8169		IL-1B	30.0457
RGZ+LPS	GA	16.9821	16.9056	IL-1B	31.57	31.3883		14.4827		-2.43601		5.41142
RGZ+LPS	GA	17.0072		IL-1B	31.4371
RGZ+LPS	GA	16.7275		IL-1B	31.1579
RGZ+LPS	GA	16.1887	16.1523	IL-1B	29.5927	29.7227		13.5704		-3.34831		10.1846
RGZ+LPS	GA	16.0757		IL-1B	29.8904
RGZ+LPS	GA	16.1926		IL-1B	29.6851
										△△ct		F
PMA1	GA	14.8978	14.7285	TNF-A	30.5935	30.7598		16.0312	17.0022	-0.97095		1.96013
PMA1	GA	14.3141		TNF-A	30.7855
PMA1	GA	14.9737		TNF-A	30.9003
PMA2	GA	14.963	13.743	TNF-A	31.3802	31.2805		17.5375		0.53532		0.690006
PMA2	GA	13.2543		TNF-A	30.8647
PMA2	GA	13.0116		TNF-A	31.5965
PMA3	GA	13.7331	13.6864	TNF-A	30.5597	31.1243		17.4378		0.43563		0.739371
PMA3	GA	13.6194		TNF-A
PMA3	GA	13.7068		TNF-A	31.6888
LPS	GA	17.0799	17.0799	TNF-A	31.0192	31.0192		13.9393		-3.06288		8.35641
LPS	GA	17.0799		TNF-A	31.0192
LPS	GA	17.0799		TNF-A	31.0192
LPS	GA	16.0846	16.0774	TNF-A	31.4994	31.041		14.9636		-2.0386		4.10847
LPS	GA	16.2365		TNF-A	30.9447
LPS	GA	15.9112		TNF-A	30.6789
LPS	GA	14.8108	14.9371	TNF-A	30.1437	30.4877		15.5506		-1.45162		2.73514
LPS	GA	15.0824		TNF-A	30.4156
LPS	GA	14.918		TNF-A	30.9036
IL4	GA	14.9636	14.89	TNF-A	35.7435	35.873		20.9829		3.98073		0.0633404
IL4	GA	14.7727		TNF-A	35.9528
IL4	GA	14.9338		TNF-A	35.9225
IL4	GA	13.7648	13.8908	TNF-A	32.85	32.6382		18.7474		1.74524		0.298283
IL4	GA	14.1284		TNF-A	32.148
IL4	GA	13.7792		TNF-A	32.9167
IL4	GA	16.6884	16.5049	TNF-A	32.7016	33.1832		16.6783		-0.323863		1.25168
IL4	GA	16.221		TNF-A	33.721
IL4	GA	16.6053		TNF-A	33.127
RGZ+PMA	GA	15.3519	15.4382	TNF-A	31.8365	31.7735		16.3353		-0.666874		1.58763
RGZ+PMA	GA	15.2752		TNF-A	31.8225
RGZ+PMA	GA	15.6875		TNF-A	31.6616
RGZ+PMA	GA	16.795	16.6474	TNF-A	32.5714	32.3365		15.6891		-1.31304		2.48464
RGZ+PMA	GA	16.8274		TNF-A	32.4881
RGZ+PMA	GA	16.3197		TNF-A	31.95
RGZ+PMA	GA	16.9845	16.9616	TNF-A	33.1301	32.9593		15.9977		-1.00444		2.00617
RGZ+PMA	GA	16.8313		TNF-A	32.7885
RGZ+PMA	GA	17.0689		TNF-A
RGZ+LPS	GA	16.5249	16.7641	TNF-A	33.6022	33.0012		16.2371		-0.765069		1.69945
RGZ+LPS	GA	16.9504		TNF-A	32.9003
RGZ+LPS	GA	16.8169		TNF-A	32.5011
RGZ+LPS	GA	16.9821	16.9056	TNF-A	32.9018	32.4851		15.5795		-1.42266		2.6808
RGZ+LPS	GA	17.0072		TNF-A	32.2577
RGZ+LPS	GA	16.7275		TNF-A	32.2959
RGZ+LPS	GA	16.1887	16.1523	TNF-A	32.1474	31.8109		15.6586		-1.34359		2.53782
RGZ+LPS	GA	16.0757		TNF-A	31.5718
RGZ+LPS	GA	16.1926		TNF-A	31.7135
										△△ct		F
PMA1	GA	14.8978	14.7285	CD206	34.8486	34.6477		19.9192	19.6986	0.220554		0.858236		0.858236
PMA1	GA	14.3141		CD206	34.319									2.56835
PMA1	GA	14.9737		CD206	34.7755									0.453669
PMA2	GA	14.963	13.743	CD206	31.9189	32.0807		18.3378		-1.36084		2.56835		4.87663
PMA2	GA	13.2543		CD206	32.3078									3.14379
PMA2	GA	13.0116		CD206	32.0156									2.45708
PMA3	GA	13.7331	13.6864	CD206	33.946	34.5253		20.8389		1.14029		0.453669		54.4283
PMA3	GA	13.6194		CD206	34.4474									50.4022
PMA3	GA	13.7068		CD206	35.1826									69.8372
														27.7615
LPS	GA	17.0799	17.0799	CD206	34.4926	34.4926		17.4127		-2.28588		4.87663		35.8583
LPS	GA	17.0799		CD206	34.4926									38.7227
LPS	GA	17.0799		CD206	34.4926									22.9396
LPS	GA	16.0846	16.0774	CD206	34.6652	34.1235		18.0461		-1.6525		3.14379		28.7345
LPS	GA	16.2365		CD206	34.2546									15.9052
LPS	GA	15.9112		CD206	33.4508
LPS	GA	14.8108	14.9371	CD206	33.0463	33.3387		18.4017		-1.29695		2.45708
LPS	GA	15.0824		CD206	33.696
LPS	GA	14.918		CD206	33.2739
IL4	GA	14.9636	14.89	CD206	28.8839	28.8224		13.9323		-5.76629		54.4283
IL4	GA	14.7727		CD206	28.6765
IL4	GA	14.9338		CD206	28.9067
IL4	GA	13.7648	13.8908	CD206	28.247	27.934		14.0432		-5.65541		50.4022
IL4	GA	14.1284		CD206	27.9184
IL4	GA	13.7792		CD206	27.6365
IL4	GA	17.3856	17.4229	CD206	30.8976	30.9956		13.5727		-6.12592		69.8372
IL4	GA	17.4962		CD206	31.18
IL4	GA	17.3869		CD206	30.9092
RGZ+PMA	GA	15.3519	15.4382	CD206	30.1874	30.3418		14.9036		-4.79502		27.7615
RGZ+PMA	GA	15.2752		CD206	30.3023
RGZ+PMA	GA	15.6875		CD206	30.5357
RGZ+PMA	GA	16.795	16.6474	CD206	30.935	31.1817		14.5344		-5.16423		35.8583
RGZ+PMA	GA	16.8274		CD206	31.1432
RGZ+PMA	GA	16.3197		CD206	31.467
RGZ+PMA	GA	16.9845	16.9616	CD206	31.2996	31.3851		14.4235		-5.27511		38.7227
RGZ+PMA	GA	16.8313		CD206	31.2642
RGZ+PMA	GA	17.0689		CD206	31.5913
RGZ+LPS	GA	16.5249	16.7641	CD206	32.0243	31.9429		15.1788		-4.51977		22.9396
RGZ+LPS	GA	16.9504		CD206	32.722
RGZ+LPS	GA	16.8169		CD206	31.0824
RGZ+LPS	GA	16.9821	16.9056	CD206	31.9336	31.7595		14.8539		-4.84471		28.7345
RGZ+LPS	GA	17.0072		CD206	31.9869
RGZ+LPS	GA	16.7275		CD206	31.358
RGZ+LPS	GA	16.1887	16.1523	CD206	31.5626	31.8595		15.7072		-3.99143		15.9052
RGZ+LPS	GA	16.0757		CD206	31.8582
RGZ+LPS	GA	16.1926		CD206	32.1577
										△△ct		F
PMA1	GA	14.8978	14.7285	TGF-B	28.272	28.4165		13.688	13.9537	-0.265746		1.20226		1.20226
PMA1	GA	14.3141		TGF-B	28.6596									0.428445
PMA1	GA	14.9737		TGF-B	28.3179									1.94137
PMA2	GA	14.963	13.743	TGF-B	28.9454	28.9195		15.1765		1.22282		0.428445		2.79657
PMA2	GA	13.2543		TGF-B	28.8605									1.33738
PMA2	GA	13.0116		TGF-B	28.9527									2.92422
PMA3	GA	13.7331	13.6864	TGF-B	26.5918	26.6831		12.9967		-0.957072		1.94137		15.4404
PMA3	GA	13.6194		TGF-B	26.5448									6.68548
PMA3	GA	13.7068		TGF-B	26.9127									13.3814
														12.9939
LPS	GA	17.0799	17.0799	TGF-B	29.5499	29.5499		12.4701		-1.48366		2.79657		15.8894
LPS	GA	17.0799		TGF-B	29.5499									9.16413
LPS	GA	17.0799		TGF-B	29.5499									5.76512
LPS	GA	16.0846	16.0774	TGF-B	29.6604	29.6117		13.5343		-0.419407		1.33738		5.98479
LPS	GA	16.2365		TGF-B	29.2096									10.3499
LPS	GA	15.9112		TGF-B	29.9652
LPS	GA	14.8108	14.9371	TGF-B	27.3663	27.3428		12.4057		-1.54805		2.92422
LPS	GA	15.0824		TGF-B	27.2428
LPS	GA	14.918		TGF-B	27.4192
IL4	GA	14.9636	14.89	TGF-B	24.7591	24.8951		10.0051		-3.94864		15.4404
IL4	GA	14.7727		TGF-B	24.9325
IL4	GA	14.9338		TGF-B	24.9938
IL4	GA	13.7648	13.8908	TGF-B	25.3901	25.1035		11.2127		-2.74103		6.68548
IL4	GA	14.1284		TGF-B	24.9937
IL4	GA	13.7792		TGF-B	24.9267
IL4	GA	17.3856	17.4229	TGF-B	27.9741	27.6345		10.2116		-3.74216		13.3814
IL4	GA	17.4962		TGF-B	27.6328
IL4	GA	17.3869		TGF-B	27.2965
RGZ+PMA	GA	15.3519	15.4382	TGF-B	25.5601	25.6922		10.254		-3.69976		12.9939
RGZ+PMA	GA	15.2752		TGF-B	26.0331
RGZ+PMA	GA	15.6875		TGF-B	25.4834
RGZ+PMA	GA	16.795	16.6474	TGF-B	26.4833	26.6111		9.96374		-3.98999		15.8894
RGZ+PMA	GA	16.8274		TGF-B	26.4052
RGZ+PMA	GA	16.3197		TGF-B	26.9448
RGZ+PMA	GA	16.9845	16.9616	TGF-B	27.6556	27.7193		10.7577		-3.196		9.16413
RGZ+PMA	GA	16.8313		TGF-B	27.7144
RGZ+PMA	GA	17.0689		TGF-B	27.7879
RGZ+LPS	GA	16.5249	16.7641	TGF-B	27.8479	28.1905		11.4264		-2.52735		5.76512
RGZ+LPS	GA	16.9504		TGF-B	28.1674
RGZ+LPS	GA	16.8169		TGF-B	28.5561
RGZ+LPS	GA	16.9821	16.9056	TGF-B	27.7197	28.278		11.3724		-2.5813		5.98479
RGZ+LPS	GA	17.0072		TGF-B	28.5729
RGZ+LPS	GA	16.7275		TGF-B	28.5415
RGZ+LPS	GA	16.1887	16.1523	TGF-B	26.8592	26.7345		10.5822		-3.37155		10.3499
RGZ+LPS	GA	16.0757		TGF-B	26.6321
RGZ+LPS	GA	16.1926		TGF-B	26.7121
