# Supplementary material for: IGFBP3-mediated M2 Macrophage Polarization Enhances Resistance to Rosiglitazone and Cisplatin in Breast Cancer
Source: Research Square preprint supplement (doi:10.21203/rs.3.rs-5174260/v1), 2024-11-01
Supplement: Supplementary file 7 [file fig6-B-ldh analyse.xls]

## Sheet: Sheet1
	1	2	3	4	5	6	7	8	9	10	11	12
A													490
B				1.691	1.662	1.672	1.628	1.618	1.678				490
C				1.703	1.599	1.567	1.699	1.599	1.586				490
D				1.695	1.68	1.559	1.642	1.583	1.601				490
E				1.674	1.598	1.485	1.615	1.46					490
F				0.044	0.048	0.045	0.044	0.046	0.043				490
G				1.656	1.631	0.497	1.59	1.622	0.502				490
H													490

## Sheet: Sheet2
1.691	1.662	1.672	1.628	1.618	1.678
1.703	1.599	1.567	1.699	1.599	1.586
1.695	1.68	1.559	1.642	1.583	1.601
1.674	1.598	1.485	1.615	1.46
0.044	0.048	0.045	0.044	0.046	0.043
1.656	1.631	0.497	1.59	1.622	0.502
1.6435	1.1465		1.606	1.104
													0.0414304	0.0161361	0.0248583	0.0199275	0.0108696	0.0652174
1.691	1.194	1.662	1.165	1.672	1.175	1.628	1.126	1.618	1.116	1.678	1.176		0.0518971	-0.0388138	-0.0667248	0.0842391	-0.00634058	-0.0181159
1.703	1.206	1.599	1.102	1.567	1.07	1.699	1.197	1.599	1.097	1.586	1.084		0.0449193	0.031836	-0.0737026	0.0326087	-0.0208333	-0.00452899
1.695	1.198	1.68	1.183	1.559	1.062	1.642	1.14	1.583	1.081	1.601	1.099		0.0266027	-0.039686	-0.0510249	0.00815217	-0.132246	-1
1.674	1.177	1.598	1.101	1.585	1.088	1.615	1.113	1.46	0.958
	1.19375		1.13775		1.09875		1.144		1.063		1.11967		0.0414304	0.0518971	0.0449193	0.0266027	0.0199275	0.0842391	0.0326087	0.00815217
0.0414304		0.0161361		0.0248583		0.0199275		0.0108696		0.0652174			0.0161361	-0.0388138	0.031836	-0.039686	0.0108696	-0.00634058	-0.0208333	-0.132246
0.0518971		-0.0388138		-0.0667248		0.0842391		-0.00634058		-0.0181159			0.0248583	-0.0667248	-0.0737026	-0.0510249	0.0652174	-0.0181159	-0.00452899	-1
0.0449193		0.031836		-0.0737026		0.0326087		-0.0208333		-0.00452899
0.0266027		-0.039686		-0.0510249		0.00815217		-0.132246		-1
ppAR
m0	m1	m2	M0	M1	M2		1.194	1.165	1.175	1.126	1.116	1.176
1.194	1.165	1.175	1.126	1.116	1.176		1.206	1.102	1.07	1.197	1.097	1.084
1.206	1.102	1.07	1.197	1.097	1.084		1.198	1.183	1.062	1.14	1.081	1.099
1.198	0.983	1.062	1.14	1.081	1.099		1.177	1.101	1.088	1.113	0.958
1.177	1.001	0.988	1.113	0.958
							1.194	1.206	1.198	1.177	1.126	1.197	1.14	1.113
1.194	1.126	1.165	1.116	1.175	1.176		1.165	1.102	1.183	1.101	1.116	1.097	1.081	0.958
1.206	1.197	1.102	1.097	1.07	1.084		1.175	1.07	1.062	1.088	1.176	1.084	1.099
1.198	1.14	0.983	1.081	1.062	1.099
1.177	1.113	1.001	0.958	0.988
M0	M1	M2			RGZ				CONTROL
1.546	1.591	1.646		M0	0.04143	0.051897	0.044919	0.026603	0.019928	0.084239	0.032609	0.008152
1.516	1.623	1.807		M1	0.016136	-0.03881	0.031836	-0.03969	0.01087	-0.00634	-0.02083	-0.13225
				M2	0.024858	-0.06672	-0.0737	-0.05102	0.065217	-0.01812	-0.00453

## Sheet: Sheet3
M0	M1	M2
					RGZ				CONTROL					ppAR
1.546	1.591	1.646		M0	0.04143	0.051897	0.044919	0.026603	0.019928	0.084239	0.032609	0.008152		m0	m1	m2	M0	M1	M2
1.516	1.623	1.807		M1	0.016136	-0.03881	0.031836	-0.03969	0.01087	-0.00634	-0.02083	-0.13225		1.194	1.165	1.175	1.126	1.116	1.176
1.531	1.607	1.7265		M2	0.024858	-0.06672	-0.0737	-0.05102	0.065217	-0.01812	-0.00453			1.206	1.102	1.07	1.197	1.097	1.084
				ppAR										1.198	1.183	1.062	1.14	1.081	1.099
				m0	m1	m2	M0	M1	M2					1.177	1.101	1.088	1.113	0.958
				1.194	1.165	1.175	1.126	1.116	1.176
				1.206	1.102	1.07	1.197	1.097	1.084
				1.198	1.183	1.062	1.14	1.081	1.099
				1.177	1.101	1.088	1.113	0.958
				-0.337	-0.442	-0.5515	-0.405	-0.491	-0.5505
				-0.325	-0.505	-0.6565	-0.334	-0.51	-0.6425
				-0.333	-0.424	-0.6645	-0.391	-0.526	-0.6275
				-0.354	-0.506	-0.6385	-0.418	-0.649
							rgz
				m0	m1	m2	m0	m1	m2
				-0.035	0.097	-0.1485	0.089	0.16	-0.0545
				-0.008	0.168	-0.1405	-0.008	0.172	-0.1595
				0.003	0.111	-0.1255	0.024	0.164	-0.1675
				-0.009	0.084		0.147	0.143	-0.2415
								-0.01225
				-0.035	0.097	-0.1485		-0.035	-0.008	0.003	-0.009	-0.089	-0.008	-0.024	-0.147
				-0.008	0.168	-0.1405		0.097	0.168	0.111	0.084	0.16	0.172	0.164	-0.143
				0.003	0.111	-0.1255		-0.1485	-0.1405	-0.1255		-0.0545	-0.1595	-0.1675	-0.1415
				-0.009	0.084
				-0.089	0.16	-0.0545		foldchange
				-0.008	0.172	-0.1595		2.85714	0.653061	-0.244898	0.734694	7.26531	0.653061	1.95918	12
				-0.024	0.164	-0.1675		-7.91837	-13.7143	-9.06122	-6.85714	-13.0612	-14.0408	-13.3878	11.6735
				-0.147	0.143	-0.2415		12.1224	11.4694	10.2449		4.44898	13.0204	13.6735	11.551

## Sheet: Sheet4
1.194	1.206	1.198	1.177	1.126	1.197	1.14	1.113
1.165	1.102	1.183	1.101	1.116	1.097	1.081	0.958
1.175	1.07	1.062	1.088	1.176	1.084	1.099
-0.035	-0.008	0.003	-0.009	0.089	0.008	-0.024	0.147
0.097	0.168	0.111	0.084	0.16	0.172	0.164	0.143
-0.1485	-0.1405	-0.1255		-0.0545	-0.0595	-0.0675	-0.1415
-0.035	-0.008	0.003	-0.009	0.089	0.008	-0.024	0.147
0.097	0.168	0.111	0.084	0.16	0.172	0.164	0.143
-0.1485	-0.1405	-0.1255		-0.0545	-0.0595	-0.0675	-0.1415
-0.035			0.089	0.16	-0.0545
-0.008			0.008	0.172	-0.0595
0.003			-0.024	0.164	-0.0675
-0.009			0.147	0.143	-0.1415
0.097
0.168
0.111	多重比较
0.084	因变量: 数值
-0.1485	LSD
-0.1405	(I) 组别	(J) 组别	平均值差值 (I-J)	标准误差	显著性	95% 置信区间
-0.1255	下限	上限
0.089	1	2	-.12725*	0.02905	0	-0.1885	-0.066
0.008	3	.12592*	0.03137	0.001	0.0597	0.1921
-0.024	4	-.06725*	0.02905	0.033	-0.1285	-0.006
0.147	5	-.17200*	0.02905	0	-0.2333	-0.1107
0.16	6	.06850*	0.02905	0.031	0.0072	0.1298
0.172	2	1	.12725*	0.02905	0	0.066	0.1885
0.164	3	.25317*	0.03137	0	0.187	0.3194
0.143	4	0.06	0.02905	0.054	-0.0013	0.1213
-0.0545	5	-0.04475	0.02905	0.142	-0.106	0.0165
-0.0595	6	.19575*	0.02905	0	0.1345	0.257
-0.0675	3	1	-.12592*	0.03137	0.001	-0.1921	-0.0597
-0.1415	2	-.25317*	0.03137	0	-0.3194	-0.187
	4	-.19317*	0.03137	0	-0.2594	-0.127
	5	-.29792*	0.03137	0	-0.3641	-0.2317
	6	-0.05742	0.03137	0.085	-0.1236	0.0088
	4	1	.06725*	0.02905	0.033	0.006	0.1285
	2	-0.06	0.02905	0.054	-0.1213	0.0013
	3	.19317*	0.03137	0	0.127	0.2594
	5	-.10475*	0.02905	0.002	-0.166	-0.0435
	6	.13575*	0.02905	0	0.0745	0.197
	5	1	.17200*	0.02905	0	0.1107	0.2333
	2	0.04475	0.02905	0.142	-0.0165	0.106
	3	.29792*	0.03137	0	0.2317	0.3641
	4	.10475*	0.02905	0.002	0.0435	0.166
	6	.24050*	0.02905	0	0.1792	0.3018
	6	1	-.06850*	0.02905	0.031	-0.1298	-0.0072
	2	-.19575*	0.02905	0	-0.257	-0.1345
	3	0.05742	0.03137	0.085	-0.0088	0.1236
	4	-.13575*	0.02905	0	-0.197	-0.0745
	5	-.24050*	0.02905	0	-0.3018	-0.1792
	*. 平均值差值的显著性水平为 0.05。
