# Supplementary material for: IGFBP3-mediated M2 Macrophage Polarization Enhances Resistance to Rosiglitazone and Cisplatin in Breast Cancer
Source: Research Square preprint supplement (doi:10.21203/rs.3.rs-5174260/v1), 2024-11-01
Supplement: Supplementary file 8 [file fig6-A-database.xlsx]

## Sheet: GSE25608top250
ID	adj.P.Val	P.Value	t	B	logFC	GI	Gene.symbol	Gene.title				adj-logFC
ILMN_1723480	0.1587	0.0019561	-3.66857	-1.18026	0.569385	542133069	BST2	bone marrow stromal cell antigen 2				-0.569385
ILMN_2132982	0.0598	2.2e-05	-5.82297	2.67368	1.17125	171460920	IGFBP5	insulin like growth factor binding protein 5				-1.17125
ILMN_1797001	0.1729	0.0026564	-3.52638	-1.44771	0.571676	77732514	DDX58	DEXD/H-box helicase 58				-0.571676		IFI27
ILMN_1692602	0.0598	2.46e-05	-5.76609	2.58018	0.927601	NA						-0.927601
ILMN_1788802	0.1221	0.0004315	-4.37377	0.13708	1.6872	66932966	GCH1	GTP cyclohydrolase 1				-1.6872		IGFBP3
ILMN_2313434	0.0598	2.73e-05	-5.71354	2.49331	0.776588	57863256	TCP1	t-complex 1				-0.776588
ILMN_2058782	0.0801	7.28e-05	-5.22657	1.66685	2.06307	572871494	IFI27	interferon alpha inducible protein 27				-2.06307
ILMN_1805111	0.0598	3.54e-05	-5.58294	2.27542	1.71448	335057562	BRWD1	bromodomain and WD repeat domain containing 1				-1.71448
ILMN_1760062	0.1595	0.0020583	-3.64491	-1.22477	0.608539	166706910	IFI44	interferon induced protein 44				-0.608539		IFI27
ILMN_1804929	0.0598	3.88e-05	-5.53732	2.19865	1.03601	32307151	OXTR	oxytocin receptor				-1.03601
ILMN_1749583	0.0612	4.37e-05	-5.47844	2.09907	0.953763	118918410	ZNF777	zinc finger protein 777				-0.953763
ILMN_1707695	0.1537	0.0015247	-3.78434	-0.96251	1.09316	400286377	IFIT1	interferon induced protein with tetratricopeptide repeats 1				-1.09316		MX1
ILMN_2135833	0.08	6.75e-05	-5.26348	1.73082	0.949077	224548934	TAL2	TAL bHLH transcription factor 2				-0.949077
ILMN_1746085	0.0598	2.23e-05	-5.81534	2.66118	0.526537	62243247	IGFBP3	insulin like growth factor binding protein 3				-0.526537
ILMN_1666449	0.0897	9.32e-05	-5.10564	1.45588	1.3344	222144291	FAM134C	family with sequence similarity 134 member C				-1.3344
ILMN_1698950	0.0897	9.38e-05	-5.10259	1.45054	0.702456	48762925	PWP2	PWP2 periodic tryptophan protein homolog (yeast)				-0.702456
ILMN_2415170	0.0897	0.0001035	-5.0547	1.36636	1.52956	112181165	VPS8	VPS8, CORVET complex subunit				-1.52956
ILMN_1780824	0.0897	0.0001048	-5.04872	1.35582	1.3574	300116185	CDK17	cyclin dependent kinase 17				-1.3574
ILMN_1757552	0.0927	0.0001143	-5.00689	1.282	0.856316	266457267	PTRF	polymerase I and transcript release factor				-0.856316
ILMN_1752451	0.0998	0.0001296	-4.94627	1.17457	0.770586	982742429	CTSH	cathepsin H				-0.770586
ILMN_1675640	0.1121	0.0001527	-4.8671	1.03352	1.08078	992319652	OAS1	2'-5'-oligoadenylate synthetase 1				-1.08078
ILMN_1751425	0.1136	0.0001622	-4.83838	0.98214	0.725259	55749803	ERMP1	endoplasmic reticulum metallopeptidase 1				-0.725259
ILMN_2383077	0.1221	0.0001861	-4.77239	0.86369	0.766944	117553618	SLC39A7	solute carrier family 39 member 7				-0.766944
ILMN_1677534	0.1221	0.0002138	-4.70627	0.74444	0.499926	987996597	SCAP	SREBF chaperone				-0.499926
ILMN_2319913	0.1221	0.000218	-4.69701	0.72769	1.58183	41872499	DGKA	diacylglycerol kinase alpha				-1.58183
ILMN_1666178	0.1221	0.0002436	-4.644	0.63164	0.723898	34147526	TP53I13	tumor protein p53 inducible protein 13				-0.723898
ILMN_1757370	0.1221	0.0002441	-4.6431	0.63	0.695627	300795588	SMPD1	sphingomyelin phosphodiesterase 1				-0.695627
ILMN_2192072	0.1221	0.0002668	-4.60092	0.55334	0.969653	974987432	MMP7	matrix metallopeptidase 7				-0.969653
ILMN_1682699	0.1221	0.0002814	-4.57559	0.50719	0.624547	124494249	PBX2	PBX homeobox 2				-0.624547
ILMN_2286024	0.1221	0.0002911	-4.55952	0.47789	0.639101	528881093	CTPS2	CTP synthase 2				-0.639101
ILMN_1739576	0.1221	0.0002973	-4.54962	0.4598	0.825578	723586610	CYB5R2	cytochrome b5 reductase 2				-0.825578
ILMN_1788283	0.1221	0.0003034	-4.53998	0.44219	1.0587	540344529	COTL1	coactosin like F-actin binding protein 1				-1.0587
ILMN_1690922	0.1221	0.0003202	-4.51448	0.39557	1.21932	112363079	MAST2	microtubule associated serine/threonine kinase 2				-1.21932
ILMN_2106902	0.1221	0.0003235	-4.50958	0.38661	0.523895	146231981	FOXN3	forkhead box N3				-0.523895
ILMN_2087646	0.1221	0.0003265	-4.50523	0.37864	0.60063	187826632	HLX	H2.0 like homeobox				-0.60063
ILMN_1731086	0.1221	0.0003284	-4.50244	0.37354	0.779321	735661406	ISL2	ISL LIM homeobox 2				-0.779321
ILMN_1799969	0.1221	0.0003362	-4.49139	0.35329	0.854059	392506459	SNAPIN	SNAP associated protein				-0.854059
ILMN_2054019	0.08	6.45e-05	-5.28597	1.76969	1.00398	193083170	ISG15	ISG15 ubiquitin-like modifier				-1.00398
ILMN_1679995	0.1221	0.0003473	4.47607	0.32522		733215687	MPP6	membrane palmitoylated protein 6				0
ILMN_1806106	0.1221	0.0003513	-4.47062	0.31522		45593129	GNL3	G protein nucleolar 3				0
ILMN_1715173	0.1221	0.0003558	-4.46467	0.3043		55743133	RPS6KA1	ribosomal protein S6 kinase A1				0
ILMN_1745471	0.1221	0.0003581	-4.46155	0.29858		82734235	IRF9	interferon regulatory factor 9				0
ILMN_1695311	0.1221	0.0003828	-4.43021	0.24102		207113141	HLA-DMA	major histocompatibility complex, class II, DM alpha				0
ILMN_1796642	0.1221	0.0003992	-4.41045	0.20465		189083740	NCF2	neutrophil cytosolic factor 2				0
ILMN_2047240	0.1221	0.0004016	-4.40753	0.19928		313569790	ARSA	arylsulfatase A				0
ILMN_1718206	0.1221	0.0004017	-4.40745	0.19914		345842405	KIAA0100	KIAA0100				0
ILMN_1732300	0.1221	0.0004275	-4.37812	0.14511		NA						0
ILMN_1662358	0.0598	3.02e-05	-5.66289	2.40915	1.3271	544711172	MX1	MX dynamin like GTPase 1				-1.3271
ILMN_2231928	0.0598	2.65e-05	-5.72869	2.5184	0.906157	11342663	MX2	MX dynamin like GTPase 2				-0.906157
ILMN_1674063	0.1221	0.0004467	-4.35753	0.10712	0.978982	74229018	OAS2	2'-5'-oligoadenylate synthetase 2				-0.978982
ILMN_1714896	0.1221	0.0004574	-4.34637	0.08652		119393885	SART3	squamous cell carcinoma antigen recognized by T-cells 3				0
ILMN_1699570	0.1221	0.0004713	-4.3323	0.06053		345197253	TPD52L2	tumor protein D52 like 2				0
ILMN_1802096	0.1221	0.0004737	-4.32993	0.05615		292658761	ABTB1	ankyrin repeat and BTB domain containing 1				0
ILMN_1654289	0.1221	0.0004755	-4.32813	0.05283		380422414	ELK1	ELK1, ETS transcription factor				0
ILMN_2262044	0.1221	0.0004801	-4.3236	0.04446		961513280	PARP10	poly(ADP-ribose) polymerase family member 10				0
ILMN_1751963	0.1221	0.0004899	-4.31413	0.02695		384367996	ZCWPW1	zinc finger CW-type and PWWP domain containing 1				0
ILMN_1653319	0.1221	0.0004937	-4.31044	0.02012		193083133	MC1R	melanocortin 1 receptor				0
ILMN_1662618	0.1221	0.0004984	-4.30607	0.01203		188497651	SQSTM1	sequestosome 1				0
ILMN_1786766	0.1221	0.0005059	4.299	-0.00105		109633042	SNTB2	syntrophin beta 2				0
ILMN_1659564	0.1221	0.0005127	-4.29279	-0.01254		60218911	SEC61A1	Sec61 translocon alpha 1 subunit				0
ILMN_1797236	0.1221	0.0005131	-4.29235	-0.01337		1020158890	TGM2	transglutaminase 2				0
ILMN_1749629	0.1221	0.000546	-4.26324	-0.06729		32307160	CUL1	cullin 1				0
ILMN_1690921	0.1221	0.0005466	-4.26272	-0.06825		291219920	STAT2	signal transducer and activator of transcription 2				0
ILMN_2062754	0.1221	0.0005484	-4.26122	-0.07103		359298505	SRA1	steroid receptor RNA activator 1				0
ILMN_1708779	0.1221	0.0005652	-4.24704	-0.09733		722829124	GNLY	granulysin				0
ILMN_1668535	0.1221	0.0005901	-4.22684	-0.13483		215598711	JOSD1	Josephin domain containing 1				0
ILMN_1815190	0.1221	0.0005917	-4.22559	-0.13715		167004077	METTL1	methyltransferase like 1				0
ILMN_1800451	0.1221	0.0006028	-4.21691	-0.15327		38146093	MED16	mediator complex subunit 16				0
ILMN_1719627	0.1221	0.000604	-4.21592	-0.15511		13236578	SLC27A3	solute carrier family 27 member 3				0
ILMN_1688848	0.1221	0.0006046	-4.21545	-0.15597		261490711	TMEM44	transmembrane protein 44				0
ILMN_1740604	0.1221	0.000605	-4.21514	-0.15656		144446108	RAB11FIP5	RAB11 family interacting protein 5				0
ILMN_1671402	0.1221	0.0006191	4.20439	-0.17653		68161519	ARPP21	cAMP regulated phosphoprotein 21				0
ILMN_1653404	0.1221	0.0006221	-4.20212	-0.18075		222136625	NKIRAS2	NFKB inhibitor interacting Ras like 2				0
ILMN_2149793	0.1221	0.0006294	-4.19669	-0.19084		32563544	TTTY10	testis-specific transcript, Y-linked 10 (non-protein coding)				0
ILMN_1798657	0.1221	0.0006333	-4.19378	-0.19626		1007385929	TBL1XR1	transducin (beta)-like 1 X-linked receptor 1				0
ILMN_1814282	0.1221	0.0006465	-4.18409	-0.21428		194239665	AEN	apoptosis enhancing nuclease				0
ILMN_2395926	0.1221	0.0006472	-4.18362	-0.21515		51702244	MANBAL	mannosidase beta like				0
ILMN_1755405	0.1221	0.0006498	-4.18175	-0.21864		371940848	PGAP2	post-GPI attachment to proteins 2				0
ILMN_1674394	0.1221	0.0006535	-4.17909	-0.22357		41327713	APMAP	adipocyte plasma membrane associated protein				0
ILMN_1758523	0.1221	0.0006604	-4.17417	-0.23273		116734709	ABCA3	ATP binding cassette subfamily A member 3				0
ILMN_1666924	0.1221	0.0006611	-4.1737	-0.2336		112382374	PINK1	PTEN induced putative kinase 1				0
ILMN_1729288	0.1221	0.000663	-4.17235	-0.23613		32967293	C1QTNF6	C1q and tumor necrosis factor related protein 6				0
ILMN_1730685	0.1221	0.0006791	-4.16108	-0.2571		169403970	MRPL16	mitochondrial ribosomal protein L16				0
ILMN_1715718	0.1221	0.00069	-4.15365	-0.27092		42794621	ZNF784	zinc finger protein 784				0
ILMN_1789007	0.1221	0.000696	-4.14961	-0.27845		1007354802	APOC1	apolipoprotein C1				0
ILMN_1658684	0.1221	0.0006971	-4.14888	-0.27983		807045847	ATP9B	ATPase phospholipid transporting 9B (putative)				0
ILMN_1779071	0.1221	0.0007067	-4.14247	-0.29176		306035205	FEZ1	fasciculation and elongation protein zeta 1				0
ILMN_1743806	0.1221	0.0007087	-4.14116	-0.2942		335334990	MIF4GD	MIF4G domain containing				0
ILMN_2328813	0.1221	0.000715	-4.13701	-0.30194		78000212	DMAP1	DNA methyltransferase 1 associated protein 1				0
ILMN_1743646	0.1221	0.0007231	-4.13175	-0.31174		NA						0
ILMN_2195703	0.1221	0.0007276	4.12886	-0.31711		289577087	PPARGC1B	PPARG coactivator 1 beta				0
ILMN_1682099	0.1221	0.0007293	-4.12781	-0.31908		756140805	TNFAIP8L3	TNF alpha induced protein 8 like 3				0
ILMN_1701655	0.1232	0.0007439	-4.11855	-0.33634		39995085	SLC8B1	solute carrier family 8 member B1				0
ILMN_1693438	0.1232	0.0007668	-4.10436	-0.3628		948284369	FBXL12	F-box and leucine rich repeat protein 12				0
ILMN_2043452	0.1232	0.0007867	-4.09242	-0.38509		66879667	FANCE	Fanconi anemia complementation group E				0
ILMN_1708375	0.1232	0.0007912	-4.08972	-0.39013		196049386	IRF1	interferon regulatory factor 1				0
ILMN_1799600	0.1232	0.0007915	-4.08958	-0.3904		291291003	STARD8	StAR related lipid transfer domain containing 8				0
ILMN_1723662	0.1232	0.0008049	-4.08174	-0.40503		259490349	ABHD2	abhydrolase domain containing 2				0
ILMN_1772369	0.1232	0.0008049	-4.08171	-0.40509		291084749	PDHA1	pyruvate dehydrogenase (lipoamide) alpha 1				0
ILMN_1704404	0.1232	0.0008075	-4.08025	-0.40781		157502192	PSMD13	proteasome 26S subunit, non-ATPase 13				0
ILMN_1791912	0.1232	0.0008076	-4.08017	-0.40795		NA						0
ILMN_1692511	0.1266	0.0008381	-4.06289	-0.44024		219802779	TMEM106C	transmembrane protein 106C				0
ILMN_1812571	0.1268	0.0008574	-4.05226	-0.4601		270288765	RAB35	RAB35, member RAS oncogene family				0
ILMN_1674811	0.1221	0.0003396	-4.4867	0.3447	1.44481	387849325	OASL	2'-5'-oligoadenylate synthetase like				-1.44481
ILMN_1811392	0.1268	0.0008916	-4.03404	-0.49417		537361051	ARHGAP45	Rho GTPase activating protein 45				0
ILMN_1796316	0.1268	0.0008928	-4.03338	-0.4954		74272286	MMP9	matrix metallopeptidase 9				0
ILMN_2387990	0.1268	0.0008928	-4.03336	-0.49543		37577125	UBE2J2	ubiquitin conjugating enzyme E2 J2				0
ILMN_1700681	0.1268	0.0009004	-4.02942	-0.5028		296317367	CD99L2	CD99 molecule like 2				0
ILMN_1757537	0.1268	0.0009089	-4.02507	-0.51093		NA						0
ILMN_1712400	0.1268	0.0009124	-4.02329	-0.51427		305682590	SERPINB6	serpin family B member 6				0
ILMN_1708891	0.1268	0.0009131	-4.02288	-0.51503		40255253	SCFD2	sec1 family domain containing 2				0
ILMN_1761363	0.1288	0.0009383	-4.01021	-0.53874		297591829	VAMP4	vesicle associated membrane protein 4				0
ILMN_1652394	0.1288	0.0009444	-4.00718	-0.54441		336391091	RAB2A	RAB2A, member RAS oncogene family				0
ILMN_1725366	0.1317	0.0009742	-3.99272	-0.57147		221316635	SLC27A5	solute carrier family 27 member 5				0
ILMN_1663158	0.1347	0.0010118	-3.9751	-0.60447		197382823	ZNF174	zinc finger protein 174				0
ILMN_1724162	0.1347	0.0010139	3.97411	-0.60633		169790795	ARX	aristaless related homeobox				0
ILMN_1809543	0.1349	0.001028	-3.96769	-0.61836		219842283	BDNF	brain derived neurotrophic factor				0
ILMN_1714623	0.1349	0.0010331	-3.96536	-0.62272		56788357	TOMM22	translocase of outer mitochondrial membrane 22				0
ILMN_1691731	0.154	0.0015747	-3.76934	-0.99072	0.707058	154813198	PARP14	poly(ADP-ribose) polymerase family member 14				-0.707058
ILMN_1701413	0.137	0.0010672	-3.95025	-0.65104		342307086	PIGQ	phosphatidylinositol glycan anchor biosynthesis class Q				0
ILMN_2149782	0.137	0.0010758	3.94652	-0.65802		118572584	RAMP2	receptor activity modifying protein 2				0
ILMN_1695404	0.1371	0.0010854	-3.9424	-0.66576		187827163	LY6E	lymphocyte antigen 6 complex, locus E				0
ILMN_1678362	0.1414	0.0011394	-3.91981	-0.70812		NA						0
ILMN_1712959	0.1414	0.001148	-3.91631	-0.71468		187608704	DUSP2	dual specificity phosphatase 2				0
ILMN_1768391	0.1414	0.0011543	-3.91374	-0.7195		38569403	ARL4C	ADP ribosylation factor like GTPase 4C				0
ILMN_1685441	0.1414	0.0011563	-3.91295	-0.72098		221218979	ASAP3	ArfGAP with SH3 domain, ankyrin repeat and PH domain 3				0
ILMN_1684349	0.143	0.0011873	-3.90064	-0.74407		390979670	IL2RB	interleukin 2 receptor subunit beta				0
ILMN_1733997	0.143	0.0011883	-3.90022	-0.74486		1041818013	SIRPB1	signal regulatory protein beta 1				0
ILMN_1773063	0.1437	0.0012033	-3.89439	-0.75581		335353786	OSBPL1A	oxysterol binding protein like 1A				0
ILMN_1788251	0.1459	0.001231	-3.88381	-0.77566		295842264	SNN	stannin				0
ILMN_1671818	0.1469	0.0012808	-3.86537	-0.81028		209977034	UTS2	urotensin 2				0
ILMN_1762678	0.1469	0.0012886	-3.86255	-0.81557		740086722	NMT1	N-myristoyltransferase 1				0
ILMN_2062468	0.1469	0.0012957	-3.85999	-0.82038		359465606	IGFBP7	insulin like growth factor binding protein 7				0
ILMN_1806999	0.1469	0.0012957	-3.85998	-0.82039		226371645	B9D2	B9 protein domain 2				0
ILMN_2415776	0.1469	0.0012962	-3.8598	-0.82074		NA						0
ILMN_1699852	0.1469	0.0013027	-3.85749	-0.82507		307344674	CES4A	carboxylesterase 4A				0
ILMN_1682054	0.1469	0.0013064	-3.85617	-0.82756		379642558	SRI	sorcin				0
ILMN_1751020	0.1482	0.0013274	3.84875	-0.84149		406869265	PACSIN1	protein kinase C and casein kinase substrate in neurons 1				0
ILMN_2337928	0.1483	0.0013377	-3.84517	-0.84822		342307093	CXCR5	C-X-C motif chemokine receptor 5				0
ILMN_1669729	0.1497	0.001365	-3.83575	-0.8659		374858036	ERLIN2	ER lipid raft associated 2				0
ILMN_1695711	0.1497	0.0013837	-3.82943	-0.87778		218082878	FAM105A	family with sequence similarity 105 member A				0
ILMN_1730731	0.1497	0.0013972	-3.82491	-0.88626		154800486	ERLIN1	ER lipid raft associated 1				0
ILMN_1742547	0.1497	0.0013977	-3.82476	-0.88655		182509171	NRP1	neuropilin 1				0
ILMN_1676088	0.1497	0.001399	3.82431	-0.88739		301336159	MSRB3	methionine sulfoxide reductase B3				0
ILMN_1692760	0.1497	0.0014085	-3.82117	-0.8933		189011557	DPAGT1	dolichyl-phosphate N-acetylglucosaminephosphotransferase 1				0
ILMN_1787844	0.1497	0.0014183	-3.81795	-0.89935		54112408	MYDGF	myeloid derived growth factor				0
ILMN_1753063	0.1499	0.00143	3.81414	-0.9065		193211423	KIF15	kinesin family member 15				0
ILMN_1704629	0.1528	0.0014681	-3.80193	-0.92946		567316197	SLC1A7	solute carrier family 1 member 7				0
ILMN_1809141	0.1532	0.0014813	-3.79777	-0.93727		NA						0
ILMN_1788363	0.1537	0.0015016	-3.79144	-0.94918		263191547	MLH1	mutL homolog 1				0
ILMN_2082314	0.1537	0.0015156	-3.78713	-0.95727		209180445	TOM1	target of myb1 membrane trafficking protein				0
ILMN_2053527	0.136	0.00105	-3.95782	-0.63686	0.86014	226371705	PARP9	poly(ADP-ribose) polymerase family member 9				-0.86014
ILMN_2044471	0.1537	0.0015264	3.78383	-0.96348		224586862	NCR3	natural cytotoxicity triggering receptor 3				0
ILMN_2413278	0.154	0.0015533	-3.77569	-0.97877		341604766	RPL13	ribosomal protein L13				0
ILMN_1799467	0.1268	0.0008835	-4.03828	-0.48623	0.604466	745399079	SAMD9L	sterile alpha motif domain containing 9 like				-0.604466
ILMN_1784540	0.154	0.0015753	-3.76917	-0.99103		223468658	KBTBD2	kelch repeat and BTB domain containing 2				0
ILMN_1745420	0.154	0.0015764	-3.76884	-0.99166		558472793	PHF19	PHD finger protein 19				0
ILMN_1795286	0.154	0.0015792	-3.76801	-0.99321		57165365	C6orf47	chromosome 6 open reading frame 47				0
ILMN_1783566	0.1562	0.0016326	-3.75258	-1.02224		75677362	LMAN1L	lectin, mannose binding 1 like				0
ILMN_1812067	0.1562	0.0016398	-3.75052	-1.02611		262231832	RER1	retention in endoplasmic reticulum sorting receptor 1				0
ILMN_1746257	0.1562	0.0016432	-3.74954	-1.02794		537361059	DAZAP1	DAZ associated protein 1				0
ILMN_1672415	0.1562	0.001644	-3.74932	-1.02836		48928040	FBXO3	F-box protein 3				0
ILMN_1667199	0.1562	0.00166	-3.74482	-1.03682		403420578	SQRDL	sulfide quinone reductase-like (yeast)				0
ILMN_1664861	0.1562	0.001663	-3.74401	-1.03835		341865545	ID1	inhibitor of DNA binding 1, HLH protein				0
ILMN_1765923	0.1576	0.0016872	-3.73728	-1.051		285397307	OGFOD3	2-oxoglutarate and iron dependent oxygenase domain containing 3				0
ILMN_1790781	0.158	0.0017031	-3.73292	-1.05921		146231949	DHRS13	dehydrogenase/reductase 13				0
ILMN_1799320	0.158	0.0017289	-3.72593	-1.07235		NA						0
ILMN_1712430	0.158	0.0017441	-3.72188	-1.07996		50659067	ATP5G1	ATP synthase, H+ transporting, mitochondrial Fo complex subunit C1 (subunit 9)				0
ILMN_2356574	0.158	0.0017463	-3.72129	-1.08107		451327621	GTF3C2	general transcription factor IIIC subunit 2				0
ILMN_1782045	0.158	0.0017494	-3.72045	-1.08266		206725538	FKBP4	FK506 binding protein 4				0
ILMN_1676745	0.158	0.0017532	-3.71945	-1.08453		NA						0
ILMN_2199554	0.1583	0.0017833	-3.71154	-1.09942		NA						0
ILMN_2279339	0.1583	0.0017959	3.70827	-1.10557		395455086	WTAP	Wilms tumor 1 associated protein				0
ILMN_1682375	0.1583	0.0017971	-3.70797	-1.10613		222537718	CTU1	cytosolic thiouridylase subunit 1				0
ILMN_1661484	0.1583	0.0018005	-3.70708	-1.10781		948284443	ZBTB45	zinc finger and BTB domain containing 45				0
ILMN_1734483	0.1583	0.0018112	-3.70433	-1.11297		665821172	BSDC1	BSD domain containing 1				0
ILMN_1700477	0.1583	0.0018283	-3.69996	-1.12121		28872733	MRPL43	mitochondrial ribosomal protein L43				0
ILMN_2179083	0.1583	0.0018284	-3.69993	-1.12125		67782348	LOXL4	lysyl oxidase like 4				0
ILMN_1797021	0.1587	0.0018568	-3.69279	-1.13469		751368133	TMEM86A	transmembrane protein 86A				0
ILMN_1760400	0.1587	0.0018619	-3.69151	-1.1371		387942385	TTI2	TELO2 interacting protein 2				0
ILMN_1711270	0.1587	0.0019048	-3.68093	-1.157		1012443718	SUGP2	SURP and G-patch domain containing 2				0
ILMN_2312764	0.1587	0.0019085	3.68002	-1.15871		109715838	AJAP1	adherens junctions associated protein 1				0
ILMN_1766950	0.1587	0.0019096	3.67975	-1.15922		523425742	PCDHB13	protocadherin beta 13				0
ILMN_1714181	0.1587	0.001928	-3.6753	-1.16759		NA						0
ILMN_1764577	0.1587	0.0019399	-3.67245	-1.17295		261824029	MFNG	MFNG O-fucosylpeptide 3-beta-N-acetylglucosaminyltransferase				0
ILMN_1804663	0.1587	0.001956	-3.6686	-1.18019		357933592	THBS3	thrombospondin 3				0
ILMN_1779252	0.1221	0.0004339	-4.37113	0.13221	1.41288	313760627	TRIM22	tripartite motif containing 22				-1.41288
ILMN_2402805	0.1587	0.0019567	-3.66843	-1.18052		41872428	TRPC4AP	transient receptor potential cation channel subfamily C member 4 associated protein				0
ILMN_1710000	0.1587	0.0019646	-3.66656	-1.18403		395627634	PEX11G	peroxisomal biogenesis factor 11 gamma				0
ILMN_1678729	0.1587	0.001973	-3.66458	-1.18776		83641898	SIL1	SIL1 nucleotide exchange factor				0
ILMN_1736976	0.1587	0.0019735	-3.66445	-1.18799		538260574	HPCAL4	hippocalcin like 4				0
ILMN_1663512	0.1587	0.0019864	-3.66143	-1.19369		17017987	COX5B	cytochrome c oxidase subunit 5B				0
ILMN_1739734	0.1587	0.0019979	-3.65876	-1.1987		242246984	CLTCL1	clathrin heavy chain like 1				0
ILMN_1729208	0.1587	0.0019987	-3.65856	-1.19908		544063428	BEX3	brain expressed X-linked 3				0
ILMN_1754235	0.1595	0.0020182	-3.65406	-1.20754		527317352	SLC35C2	solute carrier family 35 member C2				0
ILMN_1776963	0.1595	0.0020289	-3.65159	-1.2122		209693469	LMAN2	lectin, mannose binding 2				0
ILMN_1742618	0.0598	3.74e-05	-5.55563	2.2295	0.826989	378925605	XAF1	XIAP associated factor 1				-0.826989
ILMN_2356955	0.1595	0.00206	3.64453	-1.22547		953514566	PLAGL1	PLAG1 like zinc finger 1				0
ILMN_1658759	0.1595	0.00206	-3.64453	-1.22548		197085593	PEX19	peroxisomal biogenesis factor 19				0
ILMN_1754421	0.1596	0.0020828	-3.63941	-1.23511		362999005	NDUFAF1	NADH:ubiquinone oxidoreductase complex assembly factor 1				0
ILMN_1679401	0.1596	0.0020833	-3.63931	-1.2353		304766649	TRPM4	transient receptor potential cation channel subfamily M member 4				0
ILMN_2285951	0.1596	0.0020989	3.63584	-1.24182		NA						0
ILMN_1721833	0.1596	0.0021029	-3.63495	-1.2435		142976756	IER5	immediate early response 5				0
ILMN_1709044	0.1601	0.0021194	-3.63131	-1.25034		313747515	TGIF2	TGFB induced factor homeobox 2				0
ILMN_2404327	0.163	0.0021739	3.61952	-1.27252		522838260	SSX2	SSX family member 2				0
ILMN_2148944	0.163	0.0021798	-3.61827	-1.27488		310832448	ADCY4	adenylate cyclase 4				0
ILMN_1659240	0.1635	0.0022033	-3.61328	-1.28427		292781511	MTMR14	myotubularin related protein 14				0
ILMN_1807981	0.1635	0.0022154	-3.61074	-1.28905		205277444	SIGIRR	single Ig and TIR domain containing				0
ILMN_1718334	0.1635	0.0022284	-3.60803	-1.29414		1023300831	ITPA	inosine triphosphatase				0
ILMN_1695246	0.1635	0.0022338	-3.6069	-1.29627		300863121	KLHDC8B	kelch domain containing 8B				0
ILMN_1785060	0.1635	0.0022391	-3.6058	-1.29834		190194419	TSPAN14	tetraspanin 14				0
ILMN_1676128	0.1655	0.0022771	3.59798	-1.31306		28559070	DNMT3A	DNA methyltransferase 3 alpha				0
ILMN_1794782	0.1658	0.0022921	-3.59492	-1.31881		46592914	ABCG1	ATP binding cassette subfamily G member 1				0
ILMN_1696933	0.1666	0.002316	-3.59012	-1.32784		208879434	NLRP3	NLR family pyrin domain containing 3				0
ILMN_1681741	0.1666	0.0023245	-3.58839	-1.33108		331284142	COA6	cytochrome c oxidase assembly factor 6				0
ILMN_1738347	0.1667	0.0023418	-3.58496	-1.33755		40316914	RNPEP	arginyl aminopeptidase				0
ILMN_2248589	0.1667	0.0023472	-3.58389	-1.33956		261878477	DHX40	DEAH-box helicase 40				0
ILMN_1666894	0.1669	0.0023671	-3.57996	-1.34694		126091140	CSPG4	chondroitin sulfate proteoglycan 4				0
ILMN_1660186	0.1669	0.0023716	-3.57909	-1.34859		115387092	SYF2	SYF2 pre-mRNA splicing factor				0
ILMN_1664698	0.1684	0.0024043	-3.57273	-1.36055		224809226	UNC119	unc-119 lipid binding chaperone				0
ILMN_1748124	0.1686	0.0024187	-3.56995	-1.36578		62865622	TSC22D3	TSC22 domain family member 3				0
ILMN_1759787	0.1688	0.0024319	-3.56741	-1.37056		40288292	THBD	thrombomodulin				0
ILMN_1804090	0.1702	0.0024628	-3.56155	-1.38157		401461822	SLC25A10	solute carrier family 25 member 10				0
ILMN_2374383	0.1704	0.0024867	-3.55706	-1.39002		298104108	TSPAN17	tetraspanin 17				0
ILMN_1779343	0.1704	0.0025025	3.55411	-1.39557		966751429	SNCB	synuclein beta				0
ILMN_1779735	0.1704	0.0025073	-3.55322	-1.39723		970949396	LAMTOR4	late endosomal/lysosomal adaptor, MAPK and MTOR activator 4				0
ILMN_1811692	0.1704	0.0025131	-3.55215	-1.39925		194097364	FTSJ3	FtsJ homolog 3				0
ILMN_1805812	0.1704	0.0025226	-3.55039	-1.40256		56550122	TOR1A	torsin family 1 member A				0
ILMN_1730391	0.1704	0.0025327	-3.54855	-1.40602		301069363	MRPS18A	mitochondrial ribosomal protein S18A				0
ILMN_2112493	0.1723	0.0025713	-3.54151	-1.41926		149999367	DAP	death associated protein				0
ILMN_2321153	0.1729	0.0026226	-3.53232	-1.43654		336285427	MUC4	mucin 4, cell surface associated				0
ILMN_1662799	0.1729	0.0026276	-3.53145	-1.43818		961513279	GPSM3	G-protein signaling modulator 3				0
ILMN_2279873	0.1729	0.0026462	-3.52815	-1.44436		532691748	WHAMM	WAS protein homolog associated with actin, golgi membranes and microtubules				0
ILMN_1771746	0.1729	0.0026509	3.52733	-1.44592		NA						0
ILMN_1762225	0.0598	2.03e-05	-5.86302	2.7392		296434212	DDX49	DEAD-box helicase 49				0
ILMN_1654629	0.1729	0.0026565	-3.52636	-1.44774		661902937	TMEM175	transmembrane protein 175				0
ILMN_1786612	0.1729	0.0026598	-3.52577	-1.44885		30410791	PSME2	proteasome activator subunit 2				0
ILMN_1714352	0.1742	0.0026946	-3.51973	-1.4602		62945416	DMWD	dystrophia myotonica, WD repeat containing				0
ILMN_1708950	0.1742	0.0027021	-3.51844	-1.46263		38708312	ASPHD1	aspartate beta-hydroxylase domain containing 1				0
ILMN_1657837	0.1746	0.0027271	-3.51417	-1.47066		217416361	ZC3H8	zinc finger CCCH-type containing 8				0
ILMN_2362245	0.1746	0.0027302	-3.51363	-1.47167		316983127	HNRNPH2	heterogeneous nuclear ribonucleoprotein H2 (H')				0
ILMN_1802923	0.1752	0.0027513	-3.51005	-1.47839		325651859	APOC2	apolipoprotein C2				0
ILMN_2296843	0.1784	0.0028133	-3.49968	-1.49788		460417280	GCDH	glutaryl-CoA dehydrogenase				0
ILMN_1797453	0.1789	0.002837	-3.49578	-1.50522		537361062	ARMC8	armadillo repeat containing 8				0
ILMN_1786072	0.1789	0.0028454	3.49441	-1.50779		296011074	MEPE	matrix extracellular phosphoglycoprotein				0
ILMN_1790338	0.18	0.0029027	-3.48513	-1.52522		38505203	PRRX2	paired related homeobox 2				0
ILMN_1689624	0.18	0.0029334	3.48024	-1.53441		387849367	MINA	MYC induced nuclear antigen				0
ILMN_1775703	0.18	0.0029386	-3.47942	-1.53595		400153772	TRAPPC6A	trafficking protein particle complex 6A				0
ILMN_1686679	0.18	0.002945	3.4784	-1.53786		114431235	ZNF462	zinc finger protein 462				0
ILMN_1652806	0.18	0.0029969	-3.47029	-1.55311		51479142	ATP5J	ATP synthase, H+ transporting, mitochondrial Fo complex subunit F6				0
adj.p<0.1	|logFC|>0.5		6 common elements in "List 1" and "List 2":
			IFI27
			IGFBP3
			ISG15
			MX1
			MX2
			XAF1

## Sheet: Sheet1
Sample	Title	Value
GSM617797	DMSO_0.5h_rep4	722.085
GSM617798	DMSO_0.5h_rep5	668.873
GSM617799	DMSO_0.5h_rep6	737.179
GSM617800	DMSO_1.5h_rep1	837.558
GSM617801	DMSO_1.5h_rep2	785.439
GSM617802	DMSO_1.5h_rep3	711.749
GSM617806	DMSO_3h_rep1	722.513
GSM617809	DMSO_3h_rep4	704.052
GSM617810	DMSO_3h_rep5	593.252
GSM617827	RSG_0.5h_rep4	953.236
GSM617828	RSG_0.5h_rep5	971.693
GSM617829	RSG_0.5h_rep6	1091.15
GSM617831	RSG_1.5h_rep2	1000.42
GSM617833	RSG_1.5h_rep4	918.497
GSM617834	RSG_1.5h_rep5	819.091
GSM617835	RSG_3h_rep1	798.3
GSM617839	RSG_3h_rep5	781.095
GSM617840	RSG_3h_rep6	1045.99

## Sheet: GSE52292.top250
ID	adj.P.Val	P.Value	t	B	logFC	Gene.symbol	Gene.title				#NAME?
9007	3.98e-05	1.25e-09	34.4	11.6812	6.14	GBP1	guanylate binding protein 1				8.90309
28224	3.98e-05	2.08e-09	32.2	11.3832	6.72	GBP4	guanylate binding protein 4				8.68194
3619	3.98e-05	3.32e-09	30.2	11.0921	4.38	CARD16	caspase recruitment domain family member 16				8.47886
41995	0.0002163	4.64e-07	15.6	7.1491	2.37	BST2	bone marrow stromal cell antigen 2				6.33348
17853	3.98e-05	5.9e-09	28	10.7127	6.95	GBP1	guanylate binding protein 1				8.22915
18554	3.98e-05	5.94e-09	28	10.7087	5.5	HESX1	HESX homeobox 1				8.22621
35582	3.98e-05	6.95e-09	27.4	10.6003	5.18	HESX1	HESX homeobox 1				8.15802
6668	3.98e-05	7.04e-09	27.4	10.5921	4.87	CASP1	caspase 1				8.15243
42173	4.08e-05	8.12e-09	26.9	10.4919	3	SP110	SP110 nuclear body protein				8.09044
23461	5.35e-05	1.24e-08	25.4	10.1859	3.01	C5orf56	chromosome 5 open reading frame 56				7.90658
27306	5.35e-05	1.3e-08	25.2	10.1531	3.35	TRIM5	tripartite motif containing 5				7.88606
19052	5.56e-05	1.69e-08	24.4	9.96002	5.42						7.77211
18338	5.56e-05	1.91e-08	24	9.86524	5.1	GBP2	guanylate binding protein 2				7.71897
28018	5.56e-05	1.91e-08	24	9.86522	3.24	DHX58	DEXH-box helicase 58				7.71897
29410	5.56e-05	1.99e-08	23.8	9.8356	2.41	NCOA7	nuclear receptor coactivator 7				7.70115
26050	5.56e-05	2.06e-08	23.7	9.80896	4.47						7.68613
35130	5.56e-05	2.09e-08	23.7	9.79753	3.12	TRIM34	tripartite motif containing 34				7.67985
21912	6.31e-05	2.51e-08	23.1	9.65678	4.57	GBP4	guanylate binding protein 4				7.60033
20420	7.48e-05	3.14e-08	22.4	9.48054	6.04	TNFSF10	tumor necrosis factor superfamily member 10				7.50307
535	8.33e-05	3.68e-08	22	9.35388	5.99	TNFSF10	tumor necrosis factor superfamily member 10				7.43415
38902	8.47e-05	4.19e-08	21.6	9.25104	3.6	CARD17	caspase recruitment domain family member 17				7.37779
42420	0.0002003	4.11e-07	15.9	7.26184	4.73	DDX58	DEXD/H-box helicase 58				6.38616
26511	8.47e-05	4.6e-08	21.3	9.17417	2.45						7.33724
35471	8.47e-05	4.67e-08	21.3	9.16293	5.95	TNFSF10	tumor necrosis factor superfamily member 10				7.33068
39258	8.47e-05	4.84e-08	21.2	9.13314	2.73						7.31515
27030	8.47e-05	5.13e-08	-21	9.08583	-2.62	ABCG2	ATP binding cassette subfamily G member 2 (Junior blood group)				7.28988
3479	8.47e-05	5.22e-08	21	9.07112	2.9	UBE2L6	ubiquitin conjugating enzyme E2 L6				7.28233
3426	8.47e-05	5.25e-08	21	9.067	5.89	TNFSF10	tumor necrosis factor superfamily member 10				7.27984
5641	8.5e-05	5.71e-08	20.7	8.99705	2.67	TRIM69	tripartite motif containing 69				7.24336
27403	8.5e-05	5.97e-08	20.6	8.96003	3.8	PPM1K	protein phosphatase, Mg2+/Mn2+ dependent 1K				7.22403
30389	8.5e-05	5.97e-08	20.6	8.95957	6.27	NRIR///CMPK2	negative regulator of interferon response (non-protein coding)///cytidine/uridine monophosphate kinase 2				7.22403
37204	0.0027766	3.61e-05	8.56	2.7953	2.25	GCH1	GTP cyclohydrolase 1				4.44249
2331	0.0001029	8.04e-08	-19.8	8.71059	-2.4	PPARG	peroxisome proliferator activated receptor gamma				7.09474
39459	0.0002369	5.66e-07	15.2	6.96255	5.08	IFI27	interferon alpha inducible protein 27				6.24718
16239	0.0001029	8.64e-08	19.6	8.64946	2.39	GCA	grancalcin				7.06349
11250	0.0001029	8.79e-08	19.6	8.63532	6.12	TNFSF10	tumor necrosis factor superfamily member 10				7.05601
25574	0.0001029	9.05e-08	19.5	8.6099	5.92	TNFSF10	tumor necrosis factor superfamily member 10				7.04335
14025	0.0001029	9.05e-08	19.5	8.60985	2.48	IFI16	interferon gamma inducible protein 16				7.04335
19522	0.0001029	9.16e-08	-19.5	8.60006	-5.65	ALDH1A2	aldehyde dehydrogenase 1 family member A2				7.0381
3923	0.0001029	9.52e-08	-19.4	8.56727	-2.5	PPARG	peroxisome proliferator activated receptor gamma				7.02136
1337	0.0001029	9.54e-08	19.3	8.56478	5.04	ETV7	ETS variant 7				7.02045
29275	0.0001029	9.56e-08	19.3	8.56346	3.46	PARP14	poly(ADP-ribose) polymerase family member 14				7.01954
27204	0.0001047	9.96e-08	19.2	8.52843	4.07	ISG20	interferon stimulated exonuclease gene 20				7.00174
20850	0.0001074	1.04e-07	19.1	8.48708	4.08	PARP14	poly(ADP-ribose) polymerase family member 14				6.98297
24127	0.0001081	1.08e-07	19	8.45833	4.5	XAF1	XIAP associated factor 1				6.96658
14617	0.0001081	1.11e-07	19	8.43686	4.48	GBP3	guanylate binding protein 3				6.95468
43507	0.0001081	1.12e-07	18.9	8.42411	3.42	TRIM5	tripartite motif containing 5				6.95078
4361	0.0001093	1.19e-07	18.8	8.37656	3.28						6.92445
20274	0.0001093	1.2e-07	-18.8	8.36717	-2.56	PPARG	peroxisome proliferator activated receptor gamma				6.92082
36824	0.0001093	1.21e-07	18.7	8.36156	6.01	TNFSF10	tumor necrosis factor superfamily member 10				6.91721
34284	0.0001142	1.3e-07	18.6	8.30055	2.87	EPHB2	EPH receptor B2				6.88606
22818	0.0001142	1.31e-07	18.5	8.28884	3.17	TAP1	transporter 1, ATP binding cassette subfamily B member				6.88273
11021	0.0001187	1.4e-07	-18.4	8.23487	-2.43	PPARG	peroxisome proliferator activated receptor gamma				6.85387
14378	0.0001187	1.42e-07	-18.3	8.23487	-2.44	PPARG	peroxisome proliferator activated receptor gamma				6.84771
35696	0.0001284	1.56e-07	18.1	8.13695	5.95	TRIM22	tripartite motif containing 22				6.80688
45088	0.0001479	1.83e-07	-17.7	8.23487	-3.39	MS4A4A	membrane spanning 4-domains A4A				6.73755
20349	0.0001534	2e-07	17.5	7.91796	4.91	TNFSF13B	tumor necrosis factor superfamily member 13b				6.69897
6413	0.0001534	2.02e-07	17.5	7.91012	3.3	APOL6	apolipoprotein L6				6.69465
43594	0.0001534	2.03e-07	17.5	7.90291	6.05	TNFSF10	tumor necrosis factor superfamily member 10				6.6925
22034	0.0001534	2.08e-07	-17.4	8.23487	-2.48	PPARG	peroxisome proliferator activated receptor gamma				6.68194
42344	0.0001534	2.12e-07	17.4	7.86662	2.85	STAT1	signal transducer and activator of transcription 1				6.67366
37656	0.0001534	2.12e-07	-17.4	8.23487	-2.23	SNAI3	snail family transcriptional repressor 3				6.67366
4763	0.0001534	2.15e-07	17.4	7.85373	3.44	STAT1	signal transducer and activator of transcription 1				6.66756
18564	0.0001534	2.2e-07	17.3	7.83269	3.74	PPM1K	protein phosphatase, Mg2+/Mn2+ dependent 1K				6.65758
17604	0.0001534	2.24e-07	-17.3	8.23487	-2.9	SPINT2	serine peptidase inhibitor, Kunitz type 2				6.64975
19571	0.0001534	2.24e-07	17.3	7.8139	3.6	IFITM3	interferon induced transmembrane protein 3				6.64975
29952	0.0001534	2.27e-07	17.2	7.8026	3.49	PSMB9	proteasome subunit beta 9				6.64397
12069	0.0001572	2.36e-07	17.1	7.76726	3.22						6.62709
25427	0.0001635	2.49e-07	17	7.71894	2.85	STAT1	signal transducer and activator of transcription 1				6.6038
41655	0.000165	2.58e-07	16.9	7.68976	3.59						6.58838
43918	0.000165	2.59e-07	-16.9	8.23487	-2.95	TMEM52B	transmembrane protein 52B				6.5867
7356	0.00017	2.74e-07	16.8	7.6331	2.43						6.56225
29771	0.00017	2.74e-07	16.8	7.63233	2.82	STAT1	signal transducer and activator of transcription 1				6.56225
20381	0.0001719	2.83e-07	16.7	7.60393	5.29	MX2	MX dynamin like GTPase 2				6.54821
32773	0.0001719	2.85e-07	16.7	7.59733	3.54	PLSCR1	phospholipid scramblase 1				6.54516
14070	0.0001778	2.99e-07	16.6	7.55502	4.02	SAMD9	sterile alpha motif domain containing 9				6.52433
41264	0.0001782	3.03e-07	16.6	7.54074	2.98						6.51856
9645	0.0001823	3.19e-07	-16.5	7.49622	-1.98	SPRED1	sprouty related EVH1 domain containing 1				6.49621
28786	0.0001823	3.22e-07	16.4	7.48764	5.83	IFIT2	interferon induced protein with tetratricopeptide repeats 2				6.49214
42521	0.0001823	3.23e-07	16.4	7.48487	3.09	ADA	adenosine deaminase				6.4908
33150	0.0001977	3.62e-07	16.2	7.37965	1.76	GNB4	G protein subunit beta 4				6.44129
18372	0.0001977	3.67e-07	16.1	7.36747	2.92	RBM43	RNA binding motif protein 43				6.43533
7460	0.0001977	3.69e-07	16.1	7.36039	3.8	TMEM140	transmembrane protein 140				6.43297
13395	0.0001977	3.7e-07	16.1	7.35858	6.15	CXCL11	C-X-C motif chemokine ligand 11				6.4318
32970	0.0001977	3.72e-07	16.1	7.35491	5.46	NKAIN1	Na+/K+ transporting ATPase interacting 1				6.42946
30437	0.0001991	3.81e-07	16.1	7.33207	2.83	STAT1	signal transducer and activator of transcription 1				6.41908
17377	0.0001991	3.85e-07	16	7.32138	2.87	ZNF618	zinc finger protein 618				6.41454
37967	0.0001991	3.9e-07	16	7.31051	2.89	STAT1	signal transducer and activator of transcription 1				6.40894
19958	0.0001991	3.93e-07	16	7.30314	3.35	RTP4	receptor transporter protein 4				6.40561
33247	0.0001991	3.96e-07	16	7.29547	5.61	CXCL11	C-X-C motif chemokine ligand 11				6.4023
8008	0.0002003	4.11e-07	-15.9	8.23487	-2.19	LRRC8C	leucine rich repeat containing 8 family member C				6.38616
3847	0.0008013	4.74e-06	11.4	4.88743	4.59	IFI44	interferon induced protein 44				5.32422
985	0.0002003	4.16e-07	15.9	7.25042	3.35	SECTM1	secreted and transmembrane 1				6.38091
20148	0.0002003	4.16e-07	15.9	7.24993	2.37	STAT2	signal transducer and activator of transcription 2				6.38091
15819	0.0002005	4.21e-07	15.8	7.23901	2.9	STAT1	signal transducer and activator of transcription 1				6.37572
3928	0.0002124	4.51e-07	15.7	7.17557	2.41	XRN1	5'-3' exoribonuclease 1				6.34582
26785	0.0038892	6.3e-05	7.9	2.21001	4.15	IFIT1	interferon induced protein with tetratricopeptide repeats 1				4.20066
2759	0.0002182	4.73e-07	15.6	7.13132	2.45	CASP10	caspase 10				6.32514
946	0.0002216	4.85e-07	15.5	7.10772	1.82	FANCA	Fanconi anemia complementation group A				6.31426
22099	0.0002225	4.92e-07	15.5	7.09449	1.71						6.30803
14168	0.0002305	5.15e-07	15.4	7.05199	4.74	GBP5	guanylate binding protein 5				6.28819
24587	0.0002318	5.23e-07	15.4	7.03755	2.86	STAT1	signal transducer and activator of transcription 1				6.2815
14433	0.0002369	5.47e-07	15.3	6.99605	2.69	IFI16	interferon gamma inducible protein 16				6.26201
43193	0.0002369	5.51e-07	15.3	6.98865	3.22	TRIM34	tripartite motif containing 34				6.25885
30080	0.0002369	5.56e-07	15.3	6.98031	3.09						6.25493
20905	0.0002369	5.56e-07	15.3	6.97963	6.46	HERC5	HECT and RLD domain containing E3 ubiquitin protein ligase 5				6.25493
29194	0.0002369	5.64e-07	-15.2	8.23487	-2.51	PPARG	peroxisome proliferator activated receptor gamma				6.24872
39611	0.0010054	7.36e-06	10.7	4.44137	2.02	IGFBP3	insulin like growth factor binding protein 3				5.13312
36112	0.0002369	5.71e-07	15.2	6.95495	5.24	IFI27	interferon alpha inducible protein 27				6.24336
27923	0.000237	5.76e-07	15.2	6.9461	2.22	DDX60	DEXD/H-box helicase 60				6.23958
32648	0.00024	5.89e-07	15.1	6.92545	5.21	IFI27	interferon alpha inducible protein 27				6.22988
18180	0.0002424	6.07e-07	15.1	6.89805	1.7	CASP4	caspase 4				6.21681
19459	0.0002424	6.17e-07	-15	8.23487	-3.81	CISH	cytokine inducible SH2 containing protein				6.20971
810	0.0002424	6.23e-07	15	6.87244	6.84	IFIT2	interferon induced protein with tetratricopeptide repeats 2				6.20551
39470	0.0002424	6.26e-07	15	6.86831	5.13	IFI27	interferon alpha inducible protein 27				6.20343
9399	0.0002424	6.32e-07	15	6.85972	2.82	PNPT1	polyribonucleotide nucleotidyltransferase 1				6.19928
24321	0.0002424	6.4e-07	15	6.84683	4.04	GBP3	guanylate binding protein 3				6.19382
37262	0.0002424	6.41e-07	15	6.84598	5.14	IFI27	interferon alpha inducible protein 27				6.19314
30993	0.0002424	6.43e-07	15	6.84375	3.29	LYSMD2	LysM domain containing 2				6.19179
34006	0.0002424	6.48e-07	15	6.8361	5.16	IFI27	interferon alpha inducible protein 27				6.18842
20119	0.0002424	6.5e-07	14.9	6.83273	2.38	B2M	beta-2-microglobulin				6.18709
25357	0.0002424	6.56e-07	14.9	6.824	4.77	IFI27	interferon alpha inducible protein 27				6.1831
7311	0.0002424	6.59e-07	-14.9	6.8192	-1.92	ACO1	aconitase 1				6.18111
33720	0.000243	6.66e-07	14.9	6.80924	1.96	SCG3	secretogranin III				6.17653
17329	0.0002478	6.85e-07	14.8	6.78318	5.1	RSAD2	radical S-adenosyl methionine domain containing 2				6.16431
35314	0.0002482	6.92e-07	14.8	6.7741	1.99	SOX5	SRY-box 5				6.15989
33345	0.0002488	7.04e-07	14.8	6.75702	4.44	SECTM1	secreted and transmembrane 1				6.15243
21171	0.0002488	7.04e-07	14.8	6.75689	2.38	BTN3A3	butyrophilin subfamily 3 member A3				6.15243
37926	0.000251	7.18e-07	-14.7	8.23487	-2.06	RHBDL3	rhomboid like 3				6.14388
7521	0.000251	7.22e-07	14.7	6.73379	4.91						6.14146
33341	0.0002578	7.49e-07	14.7	6.6986	1.79	TMEM62	transmembrane protein 62				6.12552
7341	0.0002578	7.53e-07	14.7	6.69406	2.81	RNF213	ring finger protein 213				6.12321
18883	0.0002626	7.75e-07	14.6	6.66621	1.78	FBXO6	F-box protein 6				6.1107
3771	0.0002626	7.82e-07	14.6	6.6572	5.11	IFI27	interferon alpha inducible protein 27				6.10679
30048	0.0002626	7.84e-07	14.6	6.65493	1.99	RUBCN	RUN and cysteine rich domain containing beclin 1 interacting protein				6.10568
31381	0.0002637	7.98e-07	14.5	6.63808	2.35	B2M	beta-2-microglobulin				6.098
22249	0.0002637	8.02e-07	14.5	6.63385	3.38	NTNG2	netrin G2				6.09583
453	0.0002637	8.05e-07	14.5	6.63018	2.72	PML	promyelocytic leukemia				6.0942
28985	0.0002712	8.34e-07	14.4	6.59659	3.71						6.07883
17740	0.0002813	8.71e-07	14.4	6.55481	2.41	B2M	beta-2-microglobulin				6.05998
8138	0.0002827	8.85e-07	14.3	6.53905	4.01	IFITM1	interferon induced transmembrane protein 1				6.05306
4610	0.0002827	8.88e-07	14.3	6.53658	2.9	STAT1	signal transducer and activator of transcription 1				6.05159
14061	0.0002829	8.95e-07	14.3	6.52897	2.36	B2M	beta-2-microglobulin				6.04818
21149	0.0002893	9.21e-07	14.3	6.5011	1.8	PML	promyelocytic leukemia				6.03574
23456	0.0002937	9.44e-07	14.2	6.47805	2.9	SSTR2	somatostatin receptor 2				6.02503
6469	0.0002937	9.48e-07	14.2	6.47341	2.23	BTN3A2	butyrophilin subfamily 3 member A2				6.02319
11341	0.0003074	9.99e-07	14.1	6.42309	3.2	STAT2	signal transducer and activator of transcription 2				6.00043
4122	0.0003172	1.04e-06	14	6.38623	2.19	BATF2	basic leucine zipper ATF-like transcription factor 2				5.98297
467	0.0003187	1.07e-06	14	6.36076	3.74	SERPING1	serpin family G member 1				5.97062
23349	0.0003187	1.07e-06	14	6.3585	1.8						5.97062
4555	0.0003187	1.07e-06	-14	6.35779	-1.94	MMD	monocyte to macrophage differentiation associated				5.97062
16100	0.0003187	1.07e-06	14	6.35612	1.79	CASP4	caspase 4				5.97062
44192	0.0003203	1.08e-06	-13.9	8.23487	-3.42	EPAS1	endothelial PAS domain protein 1				5.96658
9211	0.0003257	1.11e-06	13.9	6.31901	5.11	IFI27	interferon alpha inducible protein 27				5.95468
2885	0.0003257	1.12e-06	13.9	6.31588	2.26	CASK	calcium/calmodulin dependent serine protein kinase				5.95078
8190	0.0003257	1.13e-06	13.9	6.30838	2.32	B2M	beta-2-microglobulin				5.94692
10009	0.0003257	1.13e-06	13.9	6.30377	2.18	TMEM140	transmembrane protein 140				5.94692
39330	0.0003332	1.17e-06	13.8	6.2709	3.26	IFITM4P	interferon induced transmembrane protein 4 pseudogene				5.93181
44378	0.0004994	2.18e-06	12.7	5.66486	3.9	ISG15	ISG15 ubiquitin-like modifier				5.66154
3813	0.0003387	1.2e-06	13.8	6.24776	6.83	CXCL9	C-X-C motif chemokine ligand 9				5.92082
32030	0.0003396	1.21e-06	13.7	6.23909	2.42	DDX60	DEXD/H-box helicase 60				5.91721
33028	0.0003452	1.24e-06	13.7	6.21733	3.71	USP18	ubiquitin specific peptidase 18				5.90658
30684	0.0003502	1.26e-06	13.7	6.19732	1.4						5.89963
39792	0.0003523	1.28e-06	13.6	6.18569	2.37	B2M	beta-2-microglobulin				5.89279
34442	0.0003525	1.29e-06	13.6	6.17918	3.78	IFIT5	interferon induced protein with tetratricopeptide repeats 5				5.88941
43771	0.000353	1.3e-06	13.6	6.16948	2.91	STAT1	signal transducer and activator of transcription 1				5.88606
30949	0.000353	1.3e-06	13.6	6.16606	1.58	GNB4	G protein subunit beta 4				5.88606
26668	0.0003601	1.34e-06	13.5	6.14102	2.73						5.8729
32798	0.0003648	1.37e-06	13.5	6.11698	1.61	PHACTR4	phosphatase and actin regulator 4				5.86328
18984	0.0003648	1.38e-06	13.5	6.11231	3.27	EIF2AK2	eukaryotic translation initiation factor 2 alpha kinase 2				5.86012
27366	0.0003648	1.38e-06	13.5	6.11125	1.98	LGALS3BP	galectin 3 binding protein				5.86012
1894	0.0003698	1.41e-06	-13.5	8.23487	-3.21	CISH	cytokine inducible SH2 containing protein				5.85078
27950	0.0003701	1.42e-06	13.4	6.08601	2.38	B2M	beta-2-microglobulin				5.84771
3691	0.0003761	1.45e-06	-13.4	8.23487	-2.08	JADE1	jade family PHD finger 1				5.83863
13606	0.0003804	1.47e-06	13.4	6.04785	3.06	SAMD9	sterile alpha motif domain containing 9				5.83268
7743	0.0003863	1.5e-06	13.3	6.02743	2.32	B2M	beta-2-microglobulin				5.82391
2153	0.0003965	1.55e-06	-13.3	5.9965	-1.36	SLC39A8	solute carrier family 39 member 8				5.80967
32101	0.0004202	1.66e-06	13.2	5.9293	2.29	C4orf33	chromosome 4 open reading frame 33				5.77989
15928	0.0004202	1.67e-06	13.1	5.92627	2.24	PNPT1	polyribonucleotide nucleotidyltransferase 1				5.77728
7481	0.0004202	1.67e-06	13.1	5.92337	6.06	APOBEC3A	apolipoprotein B mRNA editing enzyme catalytic subunit 3A				5.77728
21137	0.0004211	1.69e-06	13.1	5.91582	1.63	CHMP5	charged multivesicular body protein 5				5.77211
5930	0.0004214	1.7e-06	13.1	5.90966	5.18	IFI27	interferon alpha inducible protein 27				5.76955
17302	0.0004322	1.75e-06	13.1	5.87912	6.14	IFI44L	interferon induced protein 44 like				5.75696
22691	0.0004322	1.76e-06	13.1	5.8742	1.89	NAGK	N-acetylglucosamine kinase				5.75449
4475	0.0004364	1.79e-06	13	5.85944	2.77						5.74715
15510	0.0004436	1.83e-06	13	5.83278	2.45	APOBEC3G	apolipoprotein B mRNA editing enzyme catalytic subunit 3G				5.73755
1928	0.0004436	1.83e-06	13	5.83268	2.83	STAT1	signal transducer and activator of transcription 1				5.73755
2977	0.0004439	1.85e-06	-13	5.82692	-1.87	GLS	glutaminase				5.73283
13026	0.0004525	1.9e-06	12.9	5.79849	2.96	USP18	ubiquitin specific peptidase 18				5.72125
3511	0.0004525	1.9e-06	12.9	5.79753	2.8	TNK2	tyrosine kinase non receptor 2				5.72125
39116	0.0004602	1.94e-06	12.9	5.77592	2.35	B2M	beta-2-microglobulin				5.7122
5492	0.0004762	2.02e-06	-12.8	5.737	-1.75	MAPKAPK3	mitogen-activated protein kinase-activated protein kinase 3				5.69465
30614	0.0004782	2.04e-06	-12.8	8.23487	-2.06	EPAS1	endothelial PAS domain protein 1				5.69037
6340	0.0004822	2.07e-06	12.8	5.71262	3.66	C1S	complement component 1, s subcomponent				5.68403
18304	0.0004822	2.08e-06	12.8	5.70952	1.44	RTCB	RNA 2',3'-cyclic phosphate and 5'-OH ligase				5.68194
25402	0.0004994	2.17e-06	12.7	5.66639	3.67	PPM1K	protein phosphatase, Mg2+/Mn2+ dependent 1K				5.66354
31255	0.0044147	7.56e-05	7.69	2.01717	3.13	MX1	MX dynamin like GTPase 1				4.12148
30858	0.0005086	2.24e-06	12.6	5.63821	1.83	ZNF618	zinc finger protein 618				5.64975
32565	0.0005086	2.25e-06	-12.6	8.23487	-2.88	GLI1	GLI family zinc finger 1				5.64782
25618	0.0005086	2.25e-06	12.6	5.62996	2.1	RUBCN	RUN and cysteine rich domain containing beclin 1 interacting protein				5.64782
36822	0.0005086	2.26e-06	12.6	5.62699	1.76	LGALS8	galectin 8				5.64589
37528	0.0005176	2.31e-06	12.6	5.60476	2.7	C5orf56	chromosome 5 open reading frame 56				5.63639
25227	0.0005252	2.36e-06	12.5	5.58543	1.82	RBM11	RNA binding motif protein 11				5.62709
34454	0.0005285	2.38e-06	12.5	5.57433	1.66	LAP3	leucine aminopeptidase 3				5.62342
20537	0.0005351	2.43e-06	12.5	5.55728	2.13	MYD88	myeloid differentiation primary response 88				5.61439
35591	0.0005406	2.46e-06	12.5	5.54229	2.02						5.60906
1492	0.0005454	2.5e-06	12.4	5.52756	4.34	PDE4B	phosphodiesterase 4B				5.60206
12147	0.0005454	2.51e-06	12.4	5.52399	1.48	ZBED1	zinc finger BED-type containing 1				5.60033
27650	0.0005454	2.52e-06	12.4	5.51928	3.42	SAMD9	sterile alpha motif domain containing 9				5.5986
38858	0.000557	2.6e-06	12.4	5.4887	2.07	PARP12	poly(ADP-ribose) polymerase family member 12				5.58503
14240	0.000557	2.61e-06	12.4	5.48529	2.34	TCF7L1	transcription factor 7 like 1				5.58336
28425	0.000557	2.62e-06	12.4	5.48222	2.13	HLA-E	major histocompatibility complex, class I, E				5.5817
8883	0.000557	2.62e-06	-12.4	8.23487	-5.29	ALDH1A2	aldehyde dehydrogenase 1 family member A2				5.5817
17693	0.0005793	2.75e-06	12.3	5.43196	1.84	PHF11	PHD finger protein 11				5.56067
7529	0.0005793	2.75e-06	12.3	5.43118	6.45	IDO1	indoleamine 2,3-dioxygenase 1				5.56067
38540	0.0005861	2.82e-06	-12.2	5.40944	-1.49	MMP1	matrix metallopeptidase 1				5.54975
31658	0.0005861	2.83e-06	12.2	5.40453	4.79	NEURL3	neuralized E3 ubiquitin protein ligase 3				5.54821
12130	0.0005861	2.83e-06	12.2	5.40451	1.3	IFT74	intraflagellar transport 74				5.54821
13760	0.0005861	2.84e-06	12.2	5.4013	2.82	APOL1	apolipoprotein L1				5.54668
12042	0.0005877	2.86e-06	12.2	5.39411	1.7	TGM1	transglutaminase 1				5.54363
17562	0.0006032	2.95e-06	-12.2	8.23487	-2.56	LRRC8B	leucine rich repeat containing 8 family member B				5.53018
23315	0.0006069	2.98e-06	12.1	5.35298	1.6	GIMAP2	GTPase, IMAP family member 2				5.52578
6600	0.0006219	3.07e-06	12.1	5.32414	2.43	B2M	beta-2-microglobulin				5.51286
4989	0.0006219	3.1e-06	12.1	5.31383	1.61	ZBED1	zinc finger BED-type containing 1				5.50864
37385	0.0006219	3.13e-06	12.1	5.3037	5.41						5.50446
39661	0.0006219	3.13e-06	12.1	5.30309	1.33	LGMN	legumain				5.50446
25342	0.0006219	3.14e-06	12.1	5.29934	1.56						5.50307
28421	0.0006219	3.15e-06	12.1	5.29894	2.3	CLEC2B	C-type lectin domain family 2 member B				5.50169
23842	0.0006219	3.15e-06	12.1	5.29778	1.61	GTPBP1	GTP binding protein 1				5.50169
37950	0.000624	3.17e-06	12	5.29009	3.09	IL15RA	interleukin 15 receptor subunit alpha				5.49894
29987	0.0006365	3.26e-06	12	5.26306	1.8	CXCL16	C-X-C motif chemokine ligand 16				5.48678
32884	0.0006365	3.28e-06	12	5.25624	2.13	HLA-F	major histocompatibility complex, class I, F				5.48413
470	0.0006365	3.3e-06	12	5.25113	4.12						5.48149
10747	0.0006365	3.3e-06	12	5.25031	1.5	EXOSC9	exosome component 9				5.48149
9112	0.0006365	3.31e-06	12	5.24878	2.44	APOL1	apolipoprotein L1				5.48017
13598	0.0006624	3.46e-06	11.9	5.20458	1.51	PSMB8	proteasome subunit beta 8				5.46092
26526	0.0006624	3.47e-06	11.9	5.20039	1.74	C19orf66	chromosome 19 open reading frame 66				5.45967
9539	0.0006736	3.55e-06	11.9	5.17935	2.08	LIMK2	LIM domain kinase 2				5.44977
30612	0.0006791	3.59e-06	11.8	5.16621	1.81	FANCA	Fanconi anemia complementation group A				5.44491
40815	0.0006791	3.6e-06	11.8	5.16283	2.42						5.4437
36665	0.0006819	3.63e-06	11.8	5.15459	2.41	NCOA7	nuclear receptor coactivator 7				5.44009
23150	0.0006949	3.72e-06	11.8	5.13148	1.71	USP41	ubiquitin specific peptidase 41				5.42946
19833	0.0007018	3.77e-06	-11.8	8.23487	-2.07	LPL	lipoprotein lipase				5.42366
16362	0.0007086	3.82e-06	11.7	5.10363	3.55	SAMD9	sterile alpha motif domain containing 9				5.41794
31053	0.0007333	3.99e-06	11.7	5.06148	1.71	LYN	LYN proto-oncogene, Src family tyrosine kinase				5.39903
27626	0.0007333	3.99e-06	-11.7	5.06107	-1.75						5.39903
16209	0.0007488	4.09e-06	11.6	5.03598	2.06	CASP10	caspase 10				5.38828
23803	0.0007552	4.14e-06	11.6	5.02338	2.36	KLK10	kallikrein related peptidase 10				5.383
34787	0.000757	4.17e-06	11.6	5.01695	1.49	CASP5	caspase 5				5.37986
adj.p<0.05	|logFC|>1
