# Supplementary material for: IGFBP3-mediated M2 Macrophage Polarization Enhances Resistance to Rosiglitazone and Cisplatin in Breast Cancer
Source: Research Square preprint supplement (doi:10.21203/rs.3.rs-5174260/v1), 2024-11-01
Supplement: Supplementary file 9 [file fig6-F-analyse.xlsx]

## Sheet: Sheet1
1	4788	79.773	11	255	381951	381951		0.604269
2	4788	88.625	7	255	424338	424338		0.702171
3	4788	71.907	7	255	344290	344290		0.51956
4	4788	31.385	4	124	150273	150273		0.240689
5	4788	31.729	7	121	151917	151917		0.244998
6	4788	24.942	4	122	119422	119422		0.200238
7	4788	132.015	0	255	632088	632088
8	4788	126.216	28	255	604323	604323
9	4788	138.4	31	255	662657	662657
10	4788	130.398	31	255	624344	624344
11	4788	129.506	30	255	620075	620075
12	4788	124.561	27	255	596400	596400
