# Supplementary material for: IGFBP3-mediated M2 Macrophage Polarization Enhances Resistance to Rosiglitazone and Cisplatin in Breast Cancer
Source: Research Square preprint supplement (doi:10.21203/rs.3.rs-5174260/v1), 2024-11-01
Supplement: Supplementary file 10 [file IGFBP3-analyse.xlsx]

## Sheet: Sheet1
IGFBP3		mean						RATE
1	513	165.103	73	222	84698	84698		1.51411	1.55788	0.971906
2	513	183.877	115	237	94329	94329		1.57556		1.01135
3	513	190.394	125	237	97672	97672		1.58396		1.01674
4	513	213.996	125	255	109780	109780		1.89603		1.21706
5	513	225.522	137	255	115693	115693		2.10458		1.35093
6	513	220.197	114	255	112961	112961		2.16966		1.3927
GA
7	320	174.809	39	255	55939	55939
8	320	187.094	94	255	59870	59870
9	320	192.697	105	255	61663	61663
10	320	180.938	84	255	57900	57900
11	320	171.787	75	255	54972	54972
12	320	162.7	49	255	52064	52064
