# Supplementary figures and images for: IGFBP3-mediated M2 Macrophage Polarization Enhances Resistance to Rosiglitazone and Cisplatin in Breast Cancer
Source: Research Square preprint supplement (doi:10.21203/rs.3.rs-5174260/v1), 2024-11-01

# Overall Survival

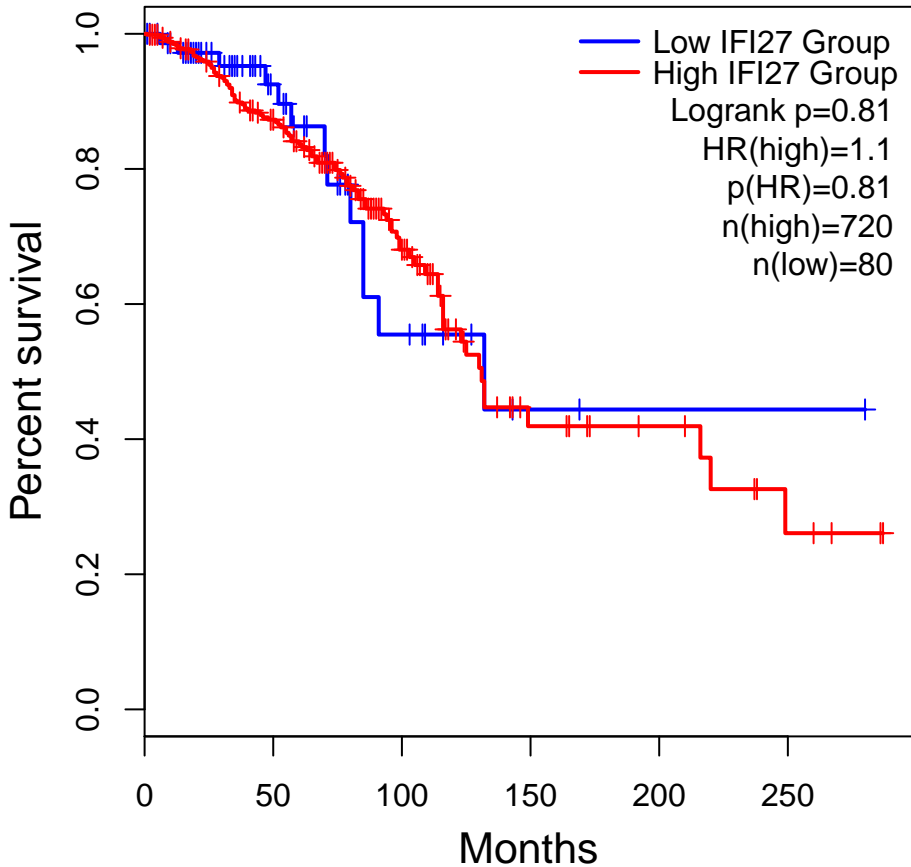

Supplement: Supplementary file 1 [file IFI27_survival_ArQMn.pdf › 0919原始数据/data-figure6/fig6-A-datebase/IFI27_survival_ArQMn.pdf]

# Overall Survival

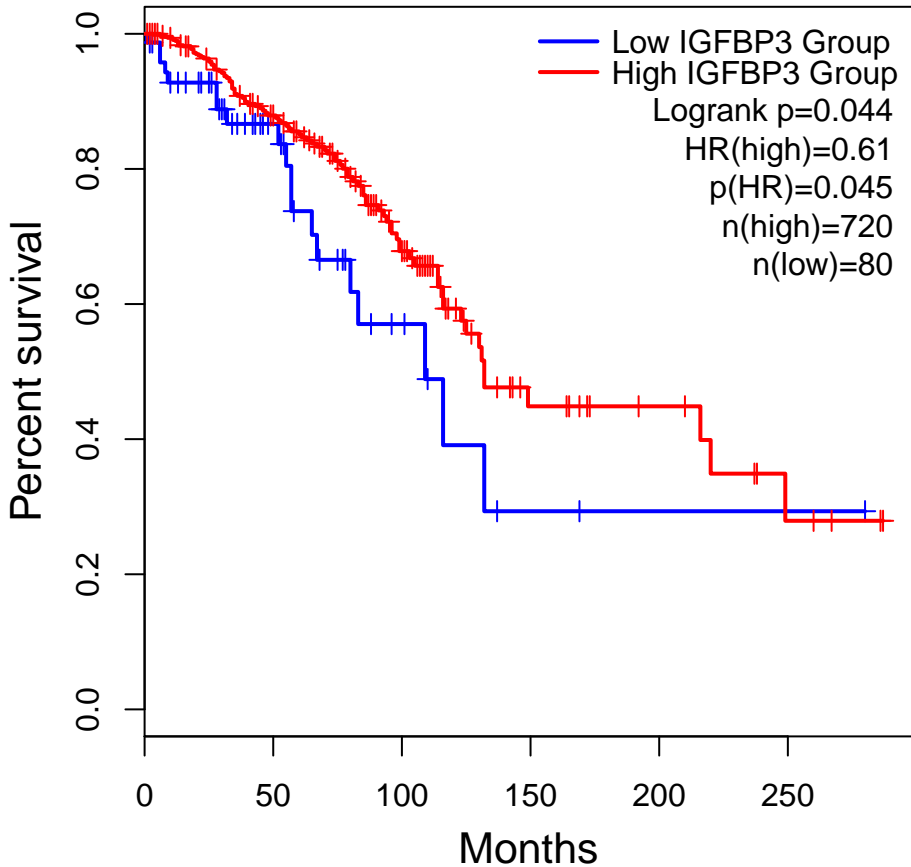

Supplement: Supplementary file 2 [file IGFBP3_survival_Icqht.pdf › 0919原始数据/data-figure6/fig6-A-datebase/IGFBP3_survival_Icqht.pdf]

# Overall Survival

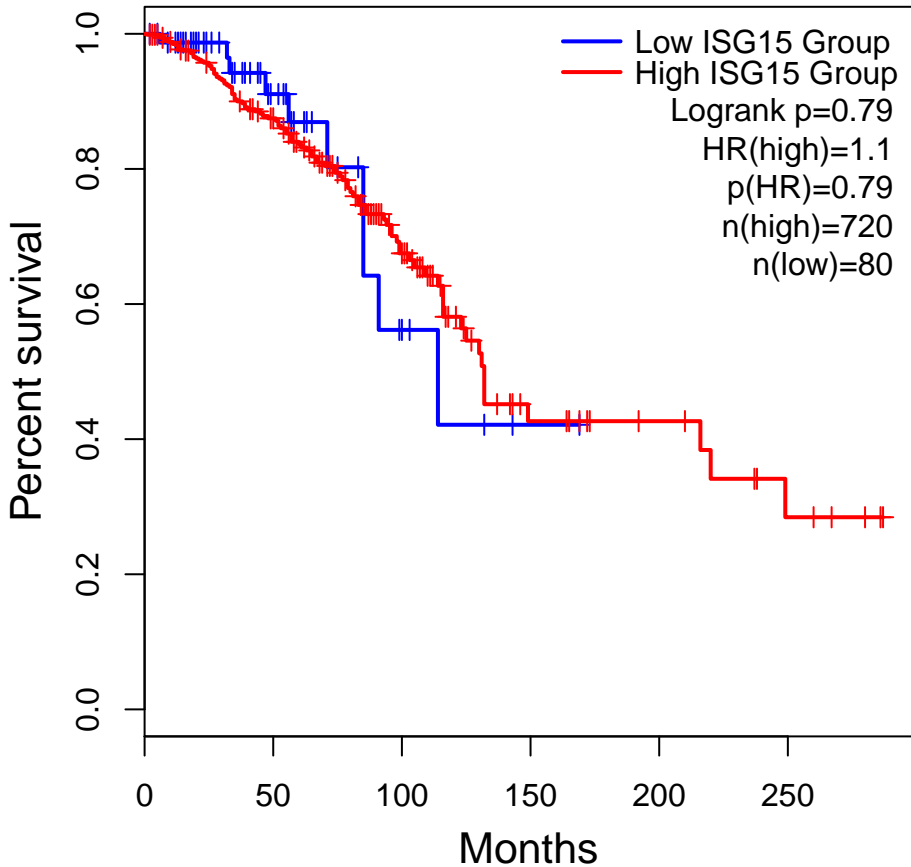

Supplement: Supplementary file 3 [file ISG15_survival_OIOjp.pdf › 0919原始数据/data-figure6/fig6-A-datebase/ISG15_survival_OIOjp.pdf]

# Overall Survival

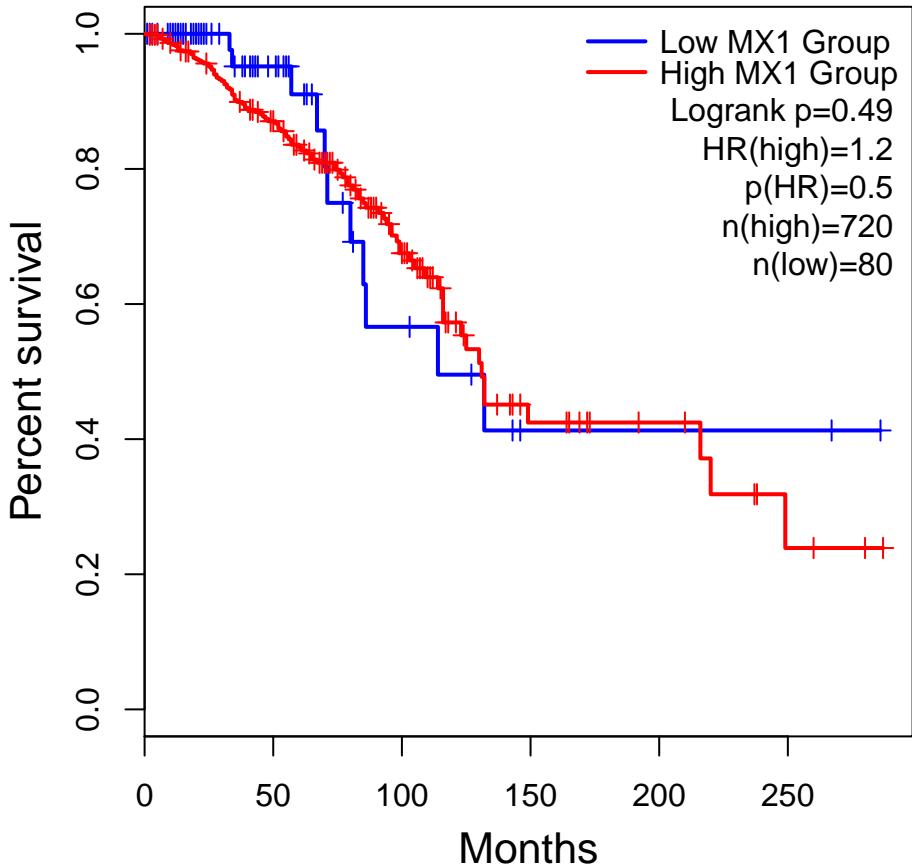

Supplement: Supplementary file 4 [file MX1_survival_fPRTK.pdf › 0919原始数据/data-figure6/fig6-A-datebase/MX1_survival_fPRTK.pdf]

# Overall Survival

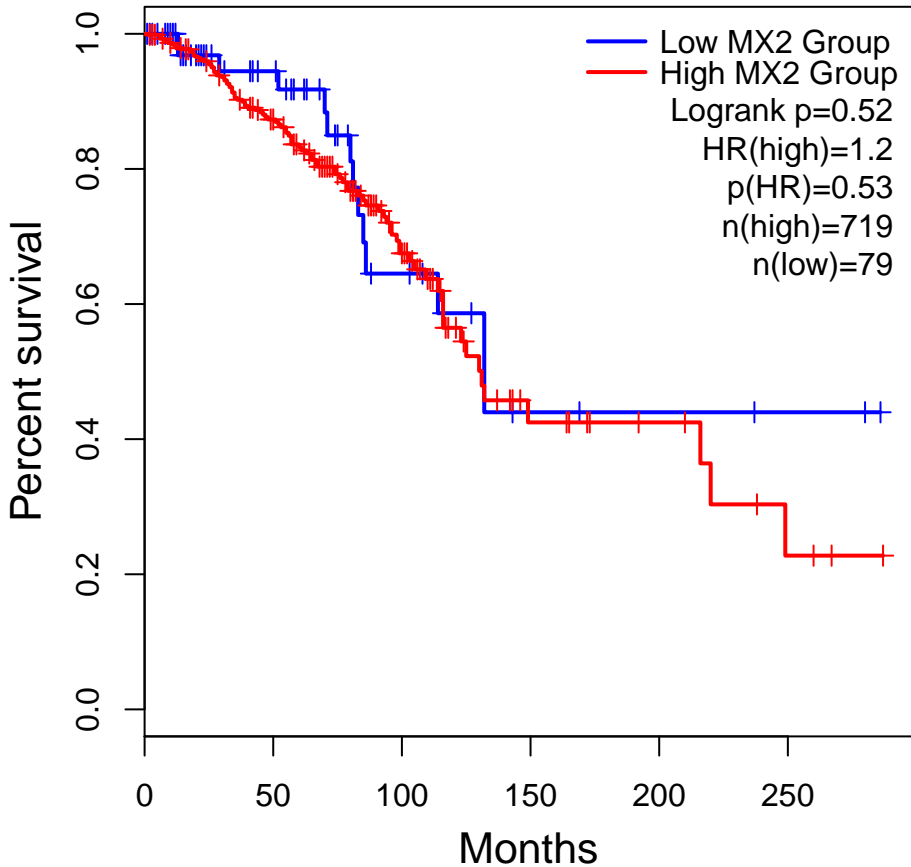

Supplement: Supplementary file 5 [file MX2_survival_SL5L5.pdf › 0919原始数据/data-figure6/fig6-A-datebase/MX2_survival_SL5L5.pdf]

# Overall Survival

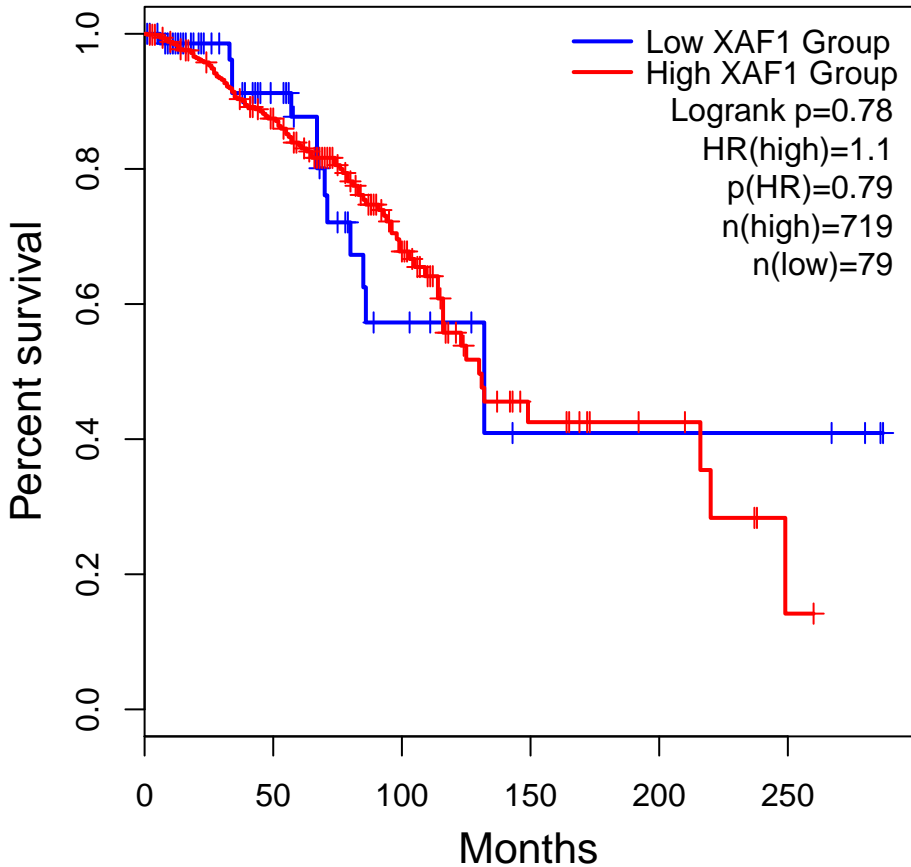

Supplement: Supplementary file 6 [file XAF1_survival_qvn8A.pdf › 0919原始数据/data-figure6/fig6-A-datebase/XAF1_survival_qvn8A.pdf]
